# Supplementary material for: Awareness, predictors and outcomes of drug alerts among people who access harm reduction services in British Columbia, Canada: findings from a 2021 cross-sectional survey
Source: PubMed Central journal article supplement — BMJ Open. 2023 May 9;13(5):e071379. doi: 10.1136/bmjopen-2022-071379 (PMC10174008; doi:10.1136/bmjopen-2022-071379), 2023-05-09
Supplement: bmjopen-2022-071379.draft_revisions.pdf [file bmjopen-2022-071379.draft_revisions.pdf]

# BMJ Open

BMJ Open is committed to open peer review. As part of this commitment we make the peer review history of every article we publish publicly available.

When an article is published we post the peer reviewers' comments and the authors' responses online. We also post the versions of the paper that were used during peer review. These are the versions that the peer review comments apply to.

The versions of the paper that follow are the versions that were submitted during the peer review process. They are not the versions of record or the final published versions. They should not be cited or distributed as the published version of this manuscript.

BMJ Open is an open access journal and the full, final, typeset and author-corrected version of record of the manuscript is available on our site with no access controls, subscription charges or pay-per-view fees (<http://bmjopen.bmj.com>).

If you have any questions on BMJ Open's open peer review process please email [info.bmjopen@bmj.com](mailto:info.bmjopen@bmj.com)

# BMJ Open

## Awareness, Predictors, and Outcomes of Drug Alerts Among People Who Access Harm Reduction Services in British Columbia, Canada: Findings from a 2021 Cross-Sectional Survey

|                               |                                                                                                                                                                                                                                                                                                                                                                                                                                                                                                                                                                                                                                                                                                        |
|-------------------------------|--------------------------------------------------------------------------------------------------------------------------------------------------------------------------------------------------------------------------------------------------------------------------------------------------------------------------------------------------------------------------------------------------------------------------------------------------------------------------------------------------------------------------------------------------------------------------------------------------------------------------------------------------------------------------------------------------------|
| Journal:                      | <i>BMJ Open</i>                                                                                                                                                                                                                                                                                                                                                                                                                                                                                                                                                                                                                                                                                        |
| Manuscript ID                 | bmjopen-2022-071379                                                                                                                                                                                                                                                                                                                                                                                                                                                                                                                                                                                                                                                                                    |
| Article Type:                 | Original research                                                                                                                                                                                                                                                                                                                                                                                                                                                                                                                                                                                                                                                                                      |
| Date Submitted by the Author: | 28-Dec-2022                                                                                                                                                                                                                                                                                                                                                                                                                                                                                                                                                                                                                                                                                            |
| Complete List of Authors:     | Daowd, Kerolos; The University of British Columbia Faculty of Medicine<br>Ferguson, Max; BC Centre for Disease Control, Harm Reduction<br>Liu, Lisa; BC Centre for Disease Control, Harm Reduction<br>Loyal, Jackson; BC Centre for Disease Control, Harm Reduction; Simon Fraser University<br>Lock, Kurt; BC Centre for Disease Control, Harm Reduction<br>Graham, Brittany; BC Centre for Disease Control, Harm Reduction<br>Lamb, Jessica; BC Centre for Disease Control, Harm Reduction<br>McDougall, Jenny; BC Centre for Disease Control, Harm Reduction<br>Buxton, Jane; BC Centre for Disease Control, Harm Reduction; University of British Columbia, School of Population and Public Health |
| Keywords:                     | PUBLIC HEALTH, EPIDEMIOLOGY, Health policy < HEALTH SERVICES ADMINISTRATION & MANAGEMENT                                                                                                                                                                                                                                                                                                                                                                                                                                                                                                                                                                                                               |
|                               |                                                                                                                                                                                                                                                                                                                                                                                                                                                                                                                                                                                                                                                                                                        |

SCHOLARONE™  
Manuscripts

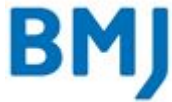

I, the Submitting Author has the right to grant and does grant on behalf of all authors of the Work (as defined in the below author licence), an exclusive licence and/or a non-exclusive licence for contributions from authors who are: i) UK Crown employees; ii) where BMJ has agreed a CC-BY licence shall apply, and/or iii) in accordance with the terms applicable for US Federal Government officers or employees acting as part of their official duties; on a worldwide, perpetual, irrevocable, royalty-free basis to BMJ Publishing Group Ltd ("BMJ") its licensees and where the relevant Journal is co-owned by BMJ to the co-owners of the Journal, to publish the Work in this journal and any other BMJ products and to exploit all rights, as set out in our [licence](#).

The Submitting Author accepts and understands that any supply made under these terms is made by BMJ to the Submitting Author unless you are acting as an employee on behalf of your employer or a postgraduate student of an affiliated institution which is paying any applicable article publishing charge ("APC") for Open Access articles. Where the Submitting Author wishes to make the Work available on an Open Access basis (and intends to pay the relevant APC), the terms of reuse of such Open Access shall be governed by a Creative Commons licence – details of these licences and which [Creative Commons](#) licence will apply to this Work are set out in our licence referred to above.

Other than as permitted in any relevant BMJ Author's Self Archiving Policies, I confirm this Work has not been accepted for publication elsewhere, is not being considered for publication elsewhere and does not duplicate material already published. I confirm all authors consent to publication of this Work and authorise the granting of this licence.

1  
2  
3  
4  
5 **Awareness, Predictors, and Outcomes of Drug Alerts Among People Who Access Harm**  
6 **Reduction Services in British Columbia, Canada: Findings from a 2021 Cross-Sectional**  
7 **Survey**  
8  
9

10  
11  
12 **Authors:**

13 Kerolos Daowd,<sup>1</sup> Max Ferguson,<sup>2</sup> Lisa Liu,<sup>2</sup> Jackson Loyal,<sup>2,3</sup> Kurt Lock,<sup>2</sup> Brittany Graham,<sup>2</sup>  
14 Jessica Lamb,<sup>2</sup> Jenny McDougall,<sup>2</sup> Jane A Buxton<sup>2,4</sup>  
15

16  
17 <sup>1</sup>Faculty of Medicine, University of British Columbia, Canada

18 <sup>2</sup>British Columbia Centre for Disease Control, Vancouver, BC, Canada

19 <sup>3</sup>Centre for Applied Research in Mental Health and Addiction, Simon Fraser University, BC  
20 Canada

21 <sup>4</sup>School of Population and Public Health, University of British Columbia, Canada  
22  
23

24 **Correspondence** to Dr. Jane Buxton; jane.buxton@ubc.ca  
25  
26

27 **Addresses**

- 28 • Faculty of Medicine, University of British Columbia, 317-2194 Health Sciences Mall, Vancouver BC V6T 1Z3
- 29 • British Columbia Centre for Disease Control, 655 W 12th Ave, Vancouver, BC V5Z 4R4, Canada.
- 30 • Centre for Applied Research in Mental Health and Addiction, Simon Fraser University, 2400 515 W  
31 Hastings St, Vancouver, BC V6B 5K3, Canada.
- 32 • School of Population and Public Health, University of British Columbia, 2206 E Mall, Vancouver, BC V6T  
33 1Z8, Canada.  
34  
35

36 **Word count: 3,600**  
37  
38  
39  
40  
41  
42  
43  
44  
45  
46  
47  
48  
49  
50  
51  
52  
53  
54  
55  
56  
57  
58  
59  
60

## ABSTRACT

**Objectives:** To assess the awareness and predictors of seeing/hearing a drug alert in British Columbia (BC) and subsequent drug use behaviour after seeing/hearing an alert.

**Methods:** This study analyzed the 2021 BC Harm Reduction Client Survey (HRCS) – a cross-sectional self-reported survey administered at harm reduction sites throughout the province and completed by participants using the services.

**Results:** In total, N = 537 respondents participated and N = 482 (89.2%) responded to the question asking if they saw/heard a drug alert. Of those, N = 300 (62.2%) stated they saw/heard a drug alert and almost half reported hearing from a friend or peer network; the majority (67.4%) reported altering their drug use behaviour to be safer after seeing/hearing a drug alert. The proportion of individuals who saw/heard a drug alert increased with each ascending age category. Amongst health authorities there were significant differences in the odds of seeing/hearing an alert. In the past 6 months, the odds of participants that attended harm reduction sites a few times per month seeing/hearing an alert were 2.73 (95% CI: 1.17-6.52) times the odds of those who did not. Those who attended more frequently were less likely to report seeing/hearing a drug alert. The odds of those who witnessed an opioid-related overdose in the past 6 months seeing/hearing an alert were 1.96 (95% CI: 0.86-4.50) times the odds of those who had not.

**Conclusion:** We found that drug alerts were mostly disseminated through communication with friends or peers and that most participants altered their drug use behaviour after seeing/hearing a drug alert. Therefore, drug alerts can play a role in reducing harms from substance use and more work is needed to reach diverse populations, such as younger people, those in differing geographical locations, and those who attend harm reduction sites more frequently.

**Keywords:** Harm reduction, opioid epidemic, public health, epidemiology

## ARTICLE SUMMARY

### Strengths and Limitations of this Study

- Provides insight into the lived and living experiences of PWUD.
- Identifies strengths and weaknesses in the communication of drug alerts.
- Enhances our understanding of the efficacy of drug alerts and the effect on drug use behaviour.

- Uses cross-sectional data, thus, preventing establishment of temporal relationships.
- Not representative of all PWUD, only those who attend harm reduction sites.

For peer review only

## INTRODUCTION

More than 100,000 drug overdose deaths were identified in the United States in 2021 (1). In Canada, there were 32,632 reported opioid toxicity deaths between January 2016 and March 2022 (2). During the same time period there were 33,493 opioid-related and 14,606 stimulant-related poisoning hospitalizations reported (3). From January to June 2022, nearly half (47%) of the reported accidental opioid toxicity deaths also involved a stimulant (2). In addition to the strain put on hospitals, emergency first responders have also been challenged to respond to the effects of toxic drug supply. In 2021, there were more than 41,600 Emergency Medical Services responses to suspected opioid-related overdoses in Canada (4).

These challenges are not limited to healthcare professionals. The COVID-19 pandemic and public health measures such as physical distancing introduced to prevent virus transmission further exacerbated this complex issue. During the first two years of the pandemic, there was a 91% increase in opioid-related toxicity deaths in Canada, compared to the two years before (3). As harm reduction services became less available and overdoses increased, peers (people with lived experience of substance use who use that experience in their work) took on a greater burden of supporting people who use drugs, but, reported increasing burnout, fatigue and grief (5).

B.C declared a public health emergency in April 2016 in response to increasing overdoses fuelled by fentanyl (6). Since 2016, B.C. has had the highest rate of opioid-related overdoses of all provinces and reported 2,267 illicit drug toxicity deaths in 2021, the highest annual number of overdose deaths ever reported (7). On August 16<sup>th</sup>, 2022, the BC Coroners Service reported reaching the tragic milestone of 10,000 lives lost to the toxic drug supply since the public health emergency was declared (8). Post-mortem toxicology in B.C has detected fentanyl or its analogues in more than 80% of deaths since 2017 (9). The proportion of cases where benzodiazepines were detected in decedents increased from 15% in July 2020 to 52% in January 2022 (9). In addition, between January 2019 to March 2020 extreme fentanyl concentrations (>50micrograms/litre) were identified in 8% of decedents and doubled to 16% between

1  
2  
3 November 2021 to August 2022 (9). Drug toxicity deaths are preventable, and advocates are  
4 calling for improved policies, treatment and harm reduction measures to support and provide  
5 resources to people who use drugs (PWUD) (5).  
6  
7  
8  
9

10 Initiatives to address the illicit drug toxicity crisis in B.C. include the implementation and  
11 expansion of harm reduction services such as opioid agonist treatment, take-home naloxone kits,  
12 supervised consumption, overdose prevention sites, and drug checking. Another strategy is the  
13 use of drug alerts to warn PWUD, members of the public, and service providers about the current  
14 risks of the circulating drug supply. In 2020, there were 160 drug alerts issued in B.C. with more  
15 than half implicating fentanyl as a concern (10). Alerts may be disseminated when harms are  
16 identified following the use of an unknown substance, or when analyses of substances identify a  
17 particular drug, combination of drugs or drug concentration of concern. Timely identification is  
18 often through drug checking services which are increasingly available across B.C., such as those  
19 provided through and in partnership with the BC Centre on Substance Use (11) and the  
20 Vancouver Island Drug Checking Project (12). Analysis of enforcement samples and decedent  
21 toxicology supplement this information but is usually delayed and thus not appropriate for timely  
22 drug alerts.  
23  
24  
25  
26  
27  
28  
29  
30  
31  
32  
33  
34

35 Drug alerts are distributed through different forms of media, including provincial, regional,  
36 and harm reduction service websites; social media and social networks; as well as being  
37 distributed through outreach activities including posters and word of mouth (13). The content of  
38 drug alerts varies from general warnings about drug use to specific details related to a single drug  
39 – details may include different names it is being sold under, colour, form, and area where it is  
40 believed to be circulating. Alerts developed and distributed by B.C. health authorities are  
41 collated by the BC Centre for Disease Control and published on the public website  
42 towardtheheart.com (14).  
43  
44  
45  
46  
47  
48  
49  
50

51 Drug alerts provide an opportunity to provide life-saving information quickly and  
52 efficiently. B.C. health authorities and community organizations utilize different methods to  
53 distribute drug alerts in order to reach PWUD who use a variety of information sources. There  
54 are also important considerations for disseminating drug alerts as well. For example, language  
55  
56  
57  
58  
59  
60



1  
2  
3 matters when issuing information related to the circulating drug supply. Information that may  
4 warn individuals about a drug's potency may lead individuals to seek out this drug because of its  
5 stronger effect (15). Furthermore, drug alerts need to focus on maintaining human dignity and  
6 respecting a person's autonomy while being informative and clear.  
7  
8  
9

10  
11  
12 Notably, drug alerts are intended to reach individuals responsible for manufacturing the  
13 substance(s) as well as those using them. In 2012, the B.C. Drug Overdose and Alert Partnership  
14 (DOAP) issued alerts provincially and locally when paramethoxymethamphetamine (PMMA), a  
15 toxic substance, was identified in people who died after using what they believed was ecstasy  
16 (16, 17). Drug alerts are also being used globally, such as in the Netherlands, where there was an  
17 observed association between drug alerts and reduced drug-associated adverse health outcomes,  
18 compared to jurisdictions not using drug alerts (18-20).  
19  
20  
21  
22  
23  
24  
25

26 Our study analyzed data from the 2021 BC Harm Reduction Client Survey (HRCS), which  
27 sampled people using harm reduction supply distribution sites around the province. Our aim was  
28 to determine the characteristics of who reported seeing/hearing drug alerts, where they saw/heard  
29 the alerts and if they reported safer use when they saw/heard an alert in order to improve the  
30 alerting process.  
31  
32  
33  
34  
35

## 36 MATERIALS AND METHODS

### 37 Data Source

38  
39  
40 The 2021 BC HRCS gathered information on substance use patterns, associated harms,  
41 stigma, and utilization of harm reduction services to inform harm reduction planning and to  
42 evaluate current practices (21). The cross-sectional HRCS was piloted in 2012 and has been  
43 administered annually since (except 2016, 2017 and 2020). Each iteration of the survey contains  
44 questions relevant to emerging issues and the priorities of stakeholders. Stakeholders, including  
45 PWUD, provided input and piloted questions on awareness of drug alerts included in the 2021  
46 HRCS. Locations for data collection were selected from a provincial network of sites that  
47 distribute supplies for safer substance use, using two-stage convenience sampling. Harm  
48 reduction program coordinators from each regional health authority identified potential sites for  
49 participation; sites were then recruited based on willingness to participate and their capacity for  
50  
51  
52  
53  
54  
55  
56  
57  
58  
59  
60

1  
2  
3 recruitment and data collection. In total, 17 harm reduction sites participated in the 2021 HRCS  
4 between March 2021 and January 2022. Trained site staff and volunteers recruited participants  
5 who received \$15 CAD and the sites received \$5 CAD per participant recruited. The anonymous  
6 paper-based survey took approximately 20 minutes to complete.  
7  
8  
9

10  
11  
12 The eligibility criteria for participants included: being 19 years of age or older, having used  
13 or currently using any illegal substance(s) other than or in addition to cannabis in the past 6  
14 months, and being able to provide verbal informed consent. Data entry and analysis occurred at  
15 the British Columbia Center for Disease Control (BCCDC) in Vancouver, B.C.. Data collection  
16 methods have been described elsewhere (10).  
17  
18  
19

## 20 21 22 **Study Variables**

23  
24 We assessed who reported recently seeing/hearing a drug alert and associations with  
25 demographic and drug use data from responses to the question “*have you recently seen or heard*  
26 *an alert about recent drug overdoses, toxic drugs found e.g., from drug checking/testing and*  
27 *other possible issues with street drugs?*” We thematically analysed responses to the question  
28 “*where did you notice these alerts?*” We assessed if seeing/hearing a drug alert led participants  
29 to report using drugs more safely by the response to “*Do you take any steps to be safer (get*  
30 *drugs checked/tested, use overdose prevention sites, use with a buddy etc.) when you see an alert*  
31 *about drugs you may use?*”  
32  
33  
34  
35  
36  
37  
38  
39

40 Demographic and drug use variables included: B.C. health authority (Fraser, Interior,  
41 Island, Northern, and Vancouver Coastal) and urbanicity (large urban, medium and small  
42 population centres) of the site where the survey was administered (see Fig. 1), age category ( $\leq 29$ ,  
43 30-39, 40-49,  $\geq 50$ , unknown), gender (cis woman, cis man, trans and gender expansive,  
44 unknown), self-reported Indigenous identity (First Nations, Métis, Inuit, non-Indigenous,  
45 unknown), employment status (employed [working full-time, part-time or paid volunteer], not  
46 employed, unknown), housing status (stably housed [living in a private residence or living in  
47 another residence - hotel/motel, rooming houses, single room occupancy, or social/supportive  
48 housing]), not stably housed [living in a shelter or having no regular place to stay -homeless,  
49 couch surfing, no fixed address], unknown), how frequently the client picked up supplies from a  
50  
51  
52  
53  
54  
55  
56  
57  
58  
59

1  
2  
3 harm reduction site in the last six months (never, every day, few times per week, few times per  
4 month, once a month or less, unknown), had a cell phone (yes, no, unknown), had a naloxone kit  
5 (yes, no, unknown), used an overdose prevention site in the past 6 months (yes, no, unknown),  
6 perceived risk of overdose from opioid (yes, no, don't know, unknown), injected any drug in the  
7 past 6 months (yes, no, unknown), frequency of drug use in the past month (none, every day, few  
8 times per week, few times per month, prefer not to say), witnessed or experienced an opioid  
9 overdose in the last 6 months (yes, no, don't know, unknown). Variables that had 'prefer not to  
10 say' and 'unknown' were combined into 'unknown'. Urbanicity was derived using the  
11 Population and Rural Area Classification 2016 system developed from Statistics Canada.  
12  
13  
14  
15  
16  
17  
18  
19  
20  
21

22 **Fig.1.** Map of sites participating in 2021 Harm Reduction Client Survey  
23  
24  
25  
26  
27  
28

### 29 **Statistical Analysis**

30  
31 Descriptive statistics and bivariable analyses with chi-square tests of independence were  
32 conducted for all variables to describe characteristics of PWUD that responded to having seen or  
33 heard of a drug alert (Table 1). Bivariate logistic regression assessing the relationship between  
34 explanatory variables and the outcome variable was conducted for all variables (Table 1). A  
35 Cochran-Armitage trend test was performed to assess for a trend between age category and the  
36 awareness of drug alerts.  
37  
38  
39  
40  
41  
42

43 Based on purposeful model building, all covariates with at least one level with a p-value of  
44 0.25 or less in bivariable regression were assessed for inclusion in the final model. In addition,  
45 owning a cellphone was included for assessment in the model despite having a p-value greater  
46 than 0.25 because conceptually it is believed that having regular access to communication and  
47 the internet increases the likelihood of seeing a drug alert. After developing the full model, we  
48 used backwards selection and Akaike Information Criterion (AIC) to determine which covariates  
49 to include in the final model. Although gender was not statistically significant in the bivariable  
50 regression, it was included in the model because of the known effects on health outcomes. We  
51  
52  
53  
54  
55  
56  
57  
58  
59  
60

1  
2  
3 used variance inflation factor (VIF) to assess for collinearity and no VIF was above 4; as such,  
4 no further investigation was required, and all covariates of interest remained in the model.  
5  
6  
7

8  
9 In developing the multivariable logistic regression model, we assessed the following  
10 variables as candidates for inclusion in the final model: age category; gender; health authority;  
11 urbanicity; owning a cellphone; owning a naloxone kit; Indigenous identity; perceived risk of  
12 opioid overdose; injecting any drug in the past 6 months; frequency of substance use in the past  
13 month other than or in addition to cannabis, alcohol, or tobacco; experiencing an unintentional  
14 opioid overdose in the past 6 months; witnessing an accidental opioid overdose in the past 6  
15 months; use of an overdose prevention site in the past 6 months; and frequency of harm  
16 reduction supply pick up in the last 6 months.  
17  
18  
19  
20  
21  
22  
23

24 Using backwards selection based on which model resulted in the smaller AIC value, we  
25 retained the following variables in the final model: age category, gender, health authority,  
26 frequency of harm reduction supply pick up in the past 6 months, and witnessing an opioid-  
27 related overdose in the past 6 months. Age category and gender were included despite not being  
28 selected for using backwards selection because of their known effects on health.  
29  
30  
31  
32  
33  
34

35 Adjusted odds ratios (AOR) and 95% confidence intervals (95% CI) were included in the  
36 final multivariable logistic regression model. Odds ratios with a p-value  $\leq 0.05$  were considered  
37 statistically significant. We used R version 4.2.0 (2022-04-22) and R Studio version  
38 2022.2.3.492 to conduct all analyses.  
39  
40  
41  
42  
43  
44

## 45 **Patient and Public Involvement**

46  
47 To ensure our analyses represent the realities of PWUD, we consulted the Professionals for  
48 Ethical Engagement of Peers (PEEP) – an advisory group of leaders with past or current illicit  
49 drug use – on our analyses and interpretations (22, 23).  
50  
51  
52  
53  
54  
55  
56  
57  
58  
59  
60

## RESULTS

Surveys were completed by 537 eligible participants from across B.C. and 482 (89.8%) participants had valid responses to the question “*have you recently seen or heard an alert?*” and were included in our analysis, of these 300 (62.2%) stated they saw/heard an alert (see Fig. 2)

Of the 261 participants who responded to the question asking if they took steps to be safer when using substances after seeing/hearing a drug alert, 176 (67.4%) reported they did subsequently take safer steps (Fig. 2).

**Fig. 2.** Summary of responses to the outcome variables of interest.

Table 1 shows the characteristics of respondents. About a third of respondents were  $\geq 50$  years old (33.0%) and participants from small urban centers accounted for 29.5%, from medium urban centers for 36.1%, and from large urban centers for 34.4%. Most respondents were cis men (62.2%), had used an overdose prevention site in the past 6 months (67.2%), did not perceive themselves at risk of an opioid overdose (58.7%), used drugs daily in the past month (66.4%), had not experienced an opioid overdose in the past 6 months (69.3%), and had witnessed an overdose due to opioids in the past 6 months (65.4%). Interior was used as the health authority reference category as it had the largest sample size. With respect to age categories, a Cochran-Armitage trend test indicated that there was an increasing trend with known age and the observation of a drug alert ( $p < 0.03$ ).

**Table 1:** Characteristics of 2021 Harm Reduction Client Survey Participants that Responded to Seeing/Hearing a Drug Alert (N = 482)

| Characteristics                                            | Saw/heard alert<br>(n=300)<br>n (%) | Did not see/hear<br>alert (n=182)<br>n (%) | Total (n= 482)<br>n (%) | Chi-Square<br>P-value | Bivariable<br>Regression<br>P-value |
|------------------------------------------------------------|-------------------------------------|--------------------------------------------|-------------------------|-----------------------|-------------------------------------|
| <i>Demographics:</i>                                       |                                     |                                            |                         |                       |                                     |
| <b>Age category</b>                                        |                                     |                                            |                         | 0.46                  |                                     |
| ≤ 29                                                       | 34 (53.1)                           | 30 (46.9)                                  | 64 (13.3)               |                       | Reference                           |
| 30-39                                                      | 72 (61.0)                           | 46 (39.0)                                  | 118 (24.5)              |                       | 0.30                                |
| 40-49                                                      | 81 (63.3)                           | 47 (36.7)                                  | 128 (26.6)              |                       | 0.18                                |
| ≥ 50                                                       | 102 (64.2)                          | 57 (35.8)                                  | 159 (33.0)              |                       | 0.13                                |
| Unknown                                                    | 11 (84.6)                           | 2 (15.4)                                   | 13 (2.6)                |                       | 0.050                               |
| <b>Gender</b>                                              |                                     |                                            |                         | 0.059                 |                                     |
| Cis man                                                    | 183 (61.0)                          | 117 (39.0)                                 | 300 (62.2)              |                       | Reference                           |
| Cis woman                                                  | 104 (62.7)                          | 62 (37.3)                                  | 166 (34.4)              |                       | 0.73                                |
| Trans and gender expansive*                                | 9 (100.0)                           | 0 (0.0)                                    | 9 (1.9)                 |                       | 0.98                                |
| Unknown                                                    | 4 (57.1)                            | 3 (42.9)                                   | 7 (1.5)                 |                       | 0.84                                |
| <b>Health Authority</b>                                    |                                     |                                            |                         | 0.041                 |                                     |
| Fraser                                                     | 52 (61.2)                           | 33 (38.8)                                  | 85 (17.6)               |                       | 0.61                                |
| Interior                                                   | 75 (57.7)                           | 55 (42.3)                                  | 130 (27.0)              |                       | Reference                           |
| Island                                                     | 81 (70.4)                           | 34 (29.6)                                  | 115 (23.9)              |                       | 0.039                               |
| Northern                                                   | 44 (52.4)                           | 40 (47.6)                                  | 84 (17.4)               |                       | 0.45                                |
| Vancouver Coastal                                          | 48 (70.6)                           | 20 (29.4)                                  | 68 (14.1)               |                       | 0.077                               |
| <b>Urbanicity</b>                                          |                                     |                                            |                         | 0.99                  |                                     |
| Large urban                                                | 103 (62.0)                          | 63 (38.0)                                  | 166 (34.4)              |                       | Reference                           |
| Medium urban                                               | 108 (62.1)                          | 66 (37.9)                                  | 174 (36.1)              |                       | 1.00                                |
| Small urban                                                | 89 (62.7)                           | 53 (37.3)                                  | 142 (29.5)              |                       | 0.91                                |
| <b>Indigenous Identity</b>                                 |                                     |                                            |                         | 0.27                  |                                     |
| Non-Indigenous                                             | 164 (65.5)                          | 86 (34.5)                                  | 250 (51.9)              |                       | Reference                           |
| Indigenous                                                 | 117 (57.4)                          | 87 (42.6)                                  | 204 (42.3)              |                       | 0.072                               |
| Unknown                                                    | 19 (67.9)                           | 9 (32.1)                                   | 28 (5.8)                |                       | 0.81                                |
| <b>Current employment**</b>                                |                                     |                                            |                         | 0.65                  |                                     |
| Unemployed                                                 | 219 (61.3)                          | 138 (38.7)                                 | 357 (74.1)              |                       | Reference                           |
| Employed                                                   | 67 (64.4)                           | 37 (35.6)                                  | 104 (21.6)              |                       | 0.57                                |
| Unknown                                                    | 14 (66.7)                           | 7 (33.3)                                   | 21 (4.3)                |                       | 0.63                                |
| <b>Currently stably housed***</b>                          |                                     |                                            |                         | 0.88                  |                                     |
| Yes                                                        | 175 (62.7)                          | 104 (37.3)                                 | 279 (57.9)              |                       | Reference                           |
| No                                                         | 111 (61.3)                          | 70 (38.7)                                  | 181 (37.6)              |                       | 0.76                                |
| Unknown                                                    | 14 (63.6)                           | 8 (34.4)                                   | 22 (4.5)                |                       | 0.93                                |
| <i>Harm Reduction (HR) Characteristics:</i>                |                                     |                                            |                         |                       |                                     |
| <b>Frequency of HR supply pick up in the past 6 months</b> |                                     |                                            |                         | 0.061                 |                                     |
| Never                                                      | 15 (41.7)                           | 21 (58.3)                                  | 36 (7.5)                |                       | Reference                           |
| Every day                                                  | 84 (65.6)                           | 44 (34.4)                                  | 128 (26.6)              |                       | 0.011                               |
| Few times/week                                             | 107 (61.1)                          | 68 (38.9)                                  | 175 (36.3)              |                       | 0.034                               |
| Few times/mo                                               | 58 (67.4)                           | 28 (32.6)                                  | 86 (17.8)               |                       | 0.0092                              |
| Once a month or less                                       | 25 (69.4)                           | 11 (30.6)                                  | 36 (7.5)                |                       | 0.019                               |
| Unknown                                                    | 11 (52.4)                           | 10 (47.6)                                  | 21 (4.3)                |                       | 0.44                                |
| <b>Have a cell phone</b>                                   |                                     |                                            |                         | 0.51                  |                                     |
| No                                                         | 121 (60.2)                          | 80 (39.8)                                  | 201 (41.7)              |                       | Reference                           |
| Yes                                                        | 161 (63.6)                          | 92 (36.4)                                  | 253 (52.5)              |                       | 0.45                                |
| Unknown                                                    | 18 (64.3)                           | 10 (35.7)                                  | 28 (5.8)                |                       | 0.68                                |
| <b>Have a naloxone kit</b>                                 |                                     |                                            |                         | 0.014                 |                                     |
| No                                                         | 47 (50.5)                           | 46 (49.5)                                  | 93 (19.3)               |                       | Reference                           |
| Yes                                                        | 242 (65.2)                          | 130 (34.8)                                 | 372 (77.2)              |                       | 0.010                               |
| Unknown                                                    | 11 (64.7)                           | 6 (35.3)                                   | 17 (3.5)                |                       | 0.29                                |

|                                                            |            |            |            |          |           |
|------------------------------------------------------------|------------|------------|------------|----------|-----------|
| <b>Used overdose prevention site in the last 6 months</b>  |            |            |            | 0.011    |           |
| No                                                         | 191 (59.0) | 133 (41.0) | 324 (67.2) |          | Reference |
| Yes                                                        | 96 (72.2)  | 37 (27.8)  | 133 (27.6) |          | 0.0083    |
| Unknown                                                    | 13 (52.)   | 12 (48.0)  | 25 (5.2)   |          | 0.50      |
| <i>Drug Use Characteristics:</i>                           |            |            |            |          |           |
| <b>Perceived risk of opioid OD</b>                         |            |            |            | 0.0089   |           |
| No                                                         | 164 (58.0) | 119 (42.0) | 283 (58.7) |          | Reference |
| Yes                                                        | 106 (73.1) | 39 (26.9)  | 145 (30.1) |          | 0.0023    |
| Don't Know                                                 | 24 (63.2)  | 14 (36.8)  | 38 (7.9)   |          | 0.54      |
| Unknown                                                    | 6 (37.5)   | 10 (62.5)  | 16 (3.3)   |          | 0.12      |
| <b>Injected any type of drug in the last 6 months</b>      |            |            |            | 0.090    |           |
| No                                                         | 152 (58.7) | 107 (41.3) | 259 (53.7) |          | Reference |
| Yes                                                        | 135 (66.8) | 67 (33.2)  | 202 (41.9) |          | 0.074     |
| Unknown                                                    | 13 (61.9)  | 8 (38.1)   | 21 (4.4)   |          | 0.77      |
| <b>Frequency of use of illicit drugs in the past month</b> |            |            |            | 0.45     |           |
| Did not use drugs                                          | 6 (46.2)   | 7 (53.8)   | 13 (2.7)   |          | Reference |
| Every day                                                  | 198 (61.9) | 122 (38.1) | 320 (66.4) |          | 0.26      |
| Few times a week                                           | 57 (67.9)  | 27 (32.1)  | 84 (17.4)  |          | 0.14      |
| Few times a month                                          | 18 (60.0)  | 12 (40.0)  | 30 (6.2)   |          | 0.40      |
| Unknown                                                    | 21 (60.0)  | 14 (40.0)  | 35 (7.3)   |          | 0.39      |
| <b>Experienced an opioid OD in the past 6 months</b>       |            |            |            | 0.29     |           |
| No                                                         | 201 (60.2) | 133 (39.8) | 334 (69.3) |          | Reference |
| Yes                                                        | 81 (67.5)  | 39 (32.5)  | 120 (24.9) |          | 0.16      |
| Don't Know                                                 | 4 (50.0)   | 4 (50.0)   | 8 (1.7)    |          | 0.56      |
| Unknown                                                    | 14 (70.0)  | 6 (30.0)   | 20 (4.1)   |          | 0.39      |
| <b>Witnessed an opioid OD in the past 6 months</b>         |            |            |            | 0.000072 |           |
| No                                                         | 68 (47.9)  | 74 (52.1)  | 142 (29.5) |          | Reference |
| Yes                                                        | 217 (68.9) | 98 (31.1)  | 315 (65.4) |          | 0.000022  |
| Don't know                                                 | 4 (80.0)   | 1 (20.0)   | 5 (1.0)    |          | 0.19      |
| Unknown                                                    | 11 (55.0)  | 9 (45.0)   | 20 (4.1)   |          | 0.55      |

\*Includes trans man, trans woman, gender non-conforming, and other specified gender.

\*\*Employed includes working part-time, full-time or being a paid volunteer.

\*\*\*Stably housed includes living in a private residence, living in another residence (hotel/motel, rooming houses, single room occupancy, or social/supportive housing). Not stably housed includes living in a shelter or having no regular place to stay (homeless, couch surfing, no fixed address).

Table 2 shows where participants reported seeing/hearing drug alerts. Responses were not mutually exclusive as participants were able to select more than one option on the survey. Almost half (N = 143) of the participants reported they became aware of the alert through a friend or peer.

**Table 2.** Where and how participants reported seeing or hearing a drug alert

| Where Alerts Were Noticed                                   | No. Of clients* (%)** |
|-------------------------------------------------------------|-----------------------|
| Heard from a friend or peer network                         | 143 (48)              |
| At a site attended                                          |                       |
| Harm reduction site/e.g., SCS/OPS or community organization | 127 (42)              |
| Healthcare provider                                         | 36 (12)               |
| Public dissemination                                        |                       |
| Posters on the street                                       | 70 (23)               |
| On the news/media                                           | 61 (20)               |
| Through phone or internet                                   |                       |
| On social media e.g., Facebook or Twitter                   | 47 (16)               |
| Received an email or text                                   | 24 (8)                |
| Other                                                       | 38 (13)               |

\*Responses are not mutually exclusive

\*\*% of N = 300 who report seeing/hearing a drug alert

We performed bivariable regression analysis on harm reduction supply pick up frequency and perceived opioid overdose risk; a chi square test indicated the two variables are associated ( $p < 0.0000001$ ), suggesting that confounding is likely. Therefore, despite perceived risk of opioid overdose being included in backwards selection it was removed from the final model because of its potential confounding effects on harm reduction supply pick up frequency. We retained frequency of supply pick up as every level with a known frequency of supply pick up was statistically significant in the bivariable regression and, conceptually, individuals who use harm reduction services more frequently would be more likely to observe a drug alert.

Unadjusted and adjusted odds ratios are presented in Table 3 for the variables included in the final model. The adjusted odds for participants from the Island Health Authority seeing/hearing a drug alert were 2.14 times the odds (95% CI: 1.20-3.85) the participants from the Interior Health Authority seeing/hearing a drug alert. In addition, the odds of participants that picked up harm reduction supplies a few times per month in the past 6 months seeing/hearing a drug alert were 2.73 (95% CI: 1.17-6.52) times the odds of participants who had not picked up harm reduction supplies in the past 6 months. Interestingly, the more often participants picked up harm reduction supplies, the odds of them reporting seeing/hearing a drug alert decreased. For example, the odds of a participant picking up harm reduction supplies every day and seeing/hearing a drug alert were 1.96 (95% CI: 0.86-4.50) times the odds of a participant that had not picked up harm reduction supplies in the past 6 months. This is elaborated on in the discussion. Witnessing an opioid-related overdose also provided significant findings – data indicates that the odds of participants who witnessed an opioid-related overdose in the past 6



months seeing/hearing a drug alert were 2.76 (95% CI: 1.76-4.36) times the odds of participants who did not witness an opioid-related overdose in the past 6 months.

**Table 3: Unadjusted (UOR) and adjusted odds ratios (AOR) for variables included in the final model (N = 482)**

| Characteristics                                            | UOR (95% CI)       | p-value for UOR | AOR (95% CI)       | p-value for AOR |
|------------------------------------------------------------|--------------------|-----------------|--------------------|-----------------|
| <i>Demographics:</i>                                       |                    |                 |                    |                 |
| <b>Age category</b>                                        | Reference          |                 | Reference          |                 |
| ≤ 29                                                       | Reference          |                 | Reference          |                 |
| 30-39                                                      | 1.38 (0.75-2.56)   | 0.30            | 1.22 (0.63-2.38)   | 0.55            |
| 40-49                                                      | 1.52 (0.83-2.80)   | 0.18            | 1.34 (0.69-2.59)   | 0.38            |
| ≥ 50                                                       | 1.58 (0.88-2.85)   | 0.13            | 1.23 (0.63-2.38)   | 0.54            |
| Unknown                                                    | 4.85 (1.18-33.01)  | 0.050           | 6.55 (1.41-48.14)  | 0.029           |
| <b>Gender</b>                                              | Reference          |                 | Reference          |                 |
| Cis man                                                    | Reference          |                 | Reference          |                 |
| Cis woman                                                  | 1.07 (0.73-1.59)   | 0.73            | 1.04 (0.68-1.58)   | 0.86            |
| Trans and gender expansive*                                | 3,680,000 (0.00-∞) | 0.98            | 8,500,000 (0.00-∞) | 0.98            |
| Unknown                                                    | 0.85 (0.18-4.39)   | 0.84            | 0.44 (0.08-2.53)   | 0.33            |
| <b>Health Authority</b>                                    | Reference          |                 | Reference          |                 |
| Interior                                                   | Reference          |                 | Reference          |                 |
| Fraser                                                     | 1.16 (0.66-2.03)   | 0.61            | 1.13 (0.62-2.07)   | 0.68            |
| Island                                                     | 1.75 (1.03-2.99)   | 0.039           | 2.14 (1.20-3.85)   | <b>0.010*</b>   |
| Northern                                                   | 0.81 (0.46-1.40)   | 0.45            | 0.84 (0.46-1.52)   | 0.56            |
| Vancouver Coastal                                          | 1.76 (0.95-3.34)   | 0.077           | 1.88 (0.96-3.75)   | 0.070           |
| <i>Harm Reduction (HR) Characteristics:</i>                |                    |                 |                    |                 |
| <b>Frequency of HR supply pick up in the past 6 months</b> | Reference          |                 | Reference          |                 |
| Never                                                      | Reference          |                 | Reference          |                 |
| Every day                                                  | 2.67 (1.26-5.78)   | 0.011           | 1.96 (0.86-4.50)   | 0.11            |
| Few times/week                                             | 2.20 (1.07-4.64)   | 0.034           | 1.79 (0.83-3.96)   | 0.14            |
| Few times/month                                            | 2.90 (1.31-6.57)   | 0.0092          | 2.73 (1.17-6.52)   | <b>0.021*</b>   |
| Once a month or less                                       | 3.18 (1.23-8.64)   | 0.019           | 2.72 (0.99-7.79)   | 0.055           |
| Unknown                                                    | 1.54 (0.52-4.62)   | 0.44            | 1.21 (0.36-4.11)   | 0.76            |
| <i>Drug Use Characteristics:</i>                           |                    |                 |                    |                 |
| <b>Witnessed an opioid OD in the past 6 months</b>         | Reference          |                 | Reference          |                 |
| No                                                         | Reference          |                 | Reference          |                 |
| Yes                                                        | 2.41 (1.61-3.63)   | 0.000022        | 2.76 (1.76-4.36)   | <b>0.00001*</b> |
| Don't know                                                 | 4.35 (0.62-86.29)  | 0.19            | 3.91 (0.47-82.13)  | 0.25            |
| Unknown                                                    | 1.33 (0.52-3.49)   | 0.55            | 1.68 (0.60-4.85)   | 0.32            |

\*Includes trans man, trans woman, gender non-conforming, and other specified gender.

## DISCUSSION

In a 2021 cross-sectional survey administered at harm reduction sites across B.C., we found over 60% of participants reported seeing/hearing a recent drug alert, and more than two-thirds who saw/heard an alert reported changing their substance use behaviour to be safer. Like previous studies we found, the most common source of alert information for our participants was from peers or through a peer network (24). Other studies confirm that the source of information is a valuable element in risk assessment when using drugs (25). For instance, participants in one study expressed a high level of trust for their drug dealers, that was based on the length of the relationship, drug supply consistencies, and their communication (25). Our study highlights that drug alerts have a role to play in encouraging safer substance use and also the value of peer networks in transmitting information. Therefore methods of disseminating accurate information through peer networks in order to effectively and timely share critical information should be further explored and enhanced.

Based on our analysis, those that picked up harm reduction supplies a few times per month (compared to those who did not pick up supplies in the past 6 months) and those that witnessed an opioid-related overdose in the past 6 months (compared to those who had not) were statistically significantly more likely to report seeing/hearing a drug alert. Additionally, the proportion of people who reported seeing/hearing a drug alert increased with each age category.

Compared to participants from Interior Health, those from Island Health had significantly higher odds of reporting seeing/hearing a drug alert, despite the number of alerts being fewer in Island Health (58 and 38 respectively). This may be due to Island Health alerts being more targeted and informed by Vancouver Island Drug Checking (12). Caution should be used in the interpretation of these findings as participants are not randomly selected and the sample size is small.

A Cochran-Armitage trend test indicated that the proportion of individuals that reported seeing/hearing a drug alert increases with each age category. An important consideration is that individuals from different age groups may have different methods of communication. For example, younger individuals may prefer digital methods while older age groups may prefer word of mouth and belong to larger networks of people who use drugs (26). This is an important

1  
2  
3 consideration when disseminating drug alerts to ensure that individuals receive the message in a  
4 timely and accessible manner. Consultation with PEEP also suggested that younger individuals  
5 may be less aware of drug alerts for the following reasons: they may feel that they are less at risk  
6 when using substances and they may intentionally ignore messaging surrounding drug use  
7 because of the stigma associated with it (27).  
8  
9  
10  
11

12  
13 Paradoxically, it was found that individuals that attended harm reduction sites more  
14 frequently were not statistically significantly likely to report seeing/hearing a drug alert. We  
15 hypothesize that this may be due to the psychological phenomenon of change blindness that may  
16 occur the more habituated one is with an environment (28, 29). A previous study found that  
17 individuals that defined their substance use as a chronic condition expressed that they were de-  
18 sensitized to the risk of overdose (30). During our consultation with PEEP, members suggested  
19 that those who attend harm reduction supply sites frequently may only be there for a brief time  
20 period, while those who attend sites less frequently may be there for longer as they may collect  
21 more supplies. This may partially explain the trend we observed, however, we cannot determine  
22 differences in drug use behaviour or time spent at the sites between those who visited harm  
23 reduction service sites more and less frequently.  
24  
25  
26  
27  
28  
29  
30  
31  
32

33 Individuals who witnessed an opioid-related overdose in the past 6 months are thought to  
34 be more sensitized to information surrounding drug alerts; however, due to the cross-sectional  
35 nature of this study, we are unable to determine causality.  
36  
37  
38

### 39 **Limitations**

40  
41  
42 The data used in this study are cross-sectional and as such we cannot make conclusions  
43 about temporal relationships. Additionally, generalizability is limited in this study as participants  
44 were a convenience sample of PWUD that accessed harm reduction services/sites and thus the  
45 findings may not apply to all PWUD in the province. The survey also relied on individuals'  
46 reporting and recollection of their behaviours which introduces recall bias. Data for this study  
47 was collected during the ongoing COVID-19 pandemic. However, the immediate restrictions and  
48 decreased availability of harm reduction services seen in spring 2020 had been addressed and  
49 individuals were able to access in-person harm reduction services in 2021.  
50  
51  
52  
53  
54  
55  
56  
57  
58  
59  
60

## CONCLUSIONS

Harm reduction is a non-judgemental approach which provides PWUD with resources and support services to provide them with autonomy to make informed decisions about their substance use. Drug alerts disseminate important and timely information about the circulating drug supply to enable people to use more safely. Our study found most people using harm reduction services were aware of drug alerts – mainly through hearing about them through a friend or peer, and that two-thirds who became aware of an alert subsequently changed their drug use behaviour to be safer. Considering communication with friends and peers was the most common method of information sharing, developing effective strategies to disseminate critical information related to the drug supply amongst social networks should be a priority when developing drug alerts. Drug alerts must use a variety of modes to ensure they are accessible to those who need to know. Further research is needed to ensure alerts are reaching the appropriate audiences and identify how to better communicate to younger PWUD.

### Acknowledgements

The authors are grateful for participants who shared their valuable experiences by completing the harm reduction client survey. We also thank Kristi Papamihali for developing the 2021 HRCS with input from stakeholders. We are thankful for harm reduction site staff and volunteers, and regional harm reduction coordinators for their implementation and data collection of the 2021 HRCS and for their commitment to supporting the community. We thank the Vancouver Area Network of Drug Users for piloting the HRCS. We would like to thank the Professionals for Ethical Engagement of Peers for their contributions and thoughtfulness to the development of the HRCS, for reviewing and interpreting results and for their input to this manuscript. We respectfully acknowledge that this study and work took place on the traditional, ancestral, and unceded territories of 205 First Nations and that we live and work on the lands of the Coast Salish peoples, including the territories of Musqueam, Squamish, and Tsleil-Waututh Nations.

## Contributors

KD conducted the initial thematic analysis and data analysis. Authors MF, LL, and JAB provided data interpretation. JAB was the principal investigator and directed data interpretation as well as project coordination. All authors provided constructive feedback on the synthesis of the manuscript. JAB is responsible for the overall content as guarantor.

## Funding

The HRCS was led by principal investigator and author Dr. Jane A Buxton. The HRCS was funded by Health Canada's Substance Use and Addictions Program (Grant 1819-HQ-000054).

**Competing interests** - None declared.

**Data availability statement** - Data are available on reasonable request.

## Ethical Considerations

The HRCS, 2021 was approved by the University of British Columbia Office Behavioural Research Ethics (#H07-00570). Verbal informed consent was obtained from each participant prior to commencing the survey.

## REFERENCES

1. Ahmad F, Cisewski J, Rossen L, *et al*. Vital Statistics Rapid Release - Provisional Drug Overdose Data [online]. Centers for Disease Control and Prevention. 2022.  
<https://www.cdc.gov/nchs/nvss/vsrr/drug-overdose-data.htm> (accessed 24 Oct 2022).
2. Special Advisory Committee on the Epidemic of Opioid Overdoses. Apparent opioid and stimulant toxicity deaths: Surveillance of opioid- and stimulant-related harms in Canada [online]. Ottawa: Public Health Agency of Canada; Dec 2022. 101 p. [https://health-infobase.canada.ca/src/doc/SRHD/Update\\_Deaths\\_2022-12.pdf](https://health-infobase.canada.ca/src/doc/SRHD/Update_Deaths_2022-12.pdf) (accessed 22 Dec 2022).
3. Special Advisory Committee on the Epidemic of Opioid Overdoses. Opioid and stimulant poisoning hospitalizations: Surveillance of opioid- and stimulant-related harms in Canada [online]. Ottawa: Public Health Agency of Canada; Dec 2022. 67 p. [https://health-infobase.canada.ca/src/doc/SRHD/Update\\_Hospitalizations\\_2022-12.pdf](https://health-infobase.canada.ca/src/doc/SRHD/Update_Hospitalizations_2022-12.pdf) (accessed 22 Dec 2022).
4. Special Advisory Committee on the Epidemic of Opioid Overdoses. Suspected opioid-related overdoses based on emergency medical services: Surveillance of opioid- and stimulant-related harms in Canada [online]. Ottawa: Public Health Agency of Canada; 2022 Jun. 28 p.  
<https://health-infobase.canada.ca/substance-related-harms/opioids-stimulants/> (accessed 24 July 2022).
5. Olding M, Boyd J, Kerr T, *et al*. “And we just have to keep going”: Task shifting and the production of burnout among overdose response workers with lived experience. *Soc Sci Med* 2021;**270**:113631. doi:10.1016/j.socscimed.2020.113631
6. Ministry of Health. Provincial health officer declares public health emergency [online]. BC Gov News. 2016 Apr 14. <https://news.gov.bc.ca/releases/2016HLTH0026-000568> (accessed 26 Apr 2022).
7. BC Coroners Service. Illicit drug toxicity deaths in BC: January 1, 2012 – August 31, 2022 [online]. Vancouver: Ministry of Public Safety & Solicitor General. 2022 Sep 28.  
<https://www2.gov.bc.ca/assets/gov/birth-adoption-death-marriage-and-divorce/deaths/coroners-service/statistical/illicit-drug.pdf> (accessed 24 Oct 2022).
8. Public Safety and Solicitor General. Ten thousand lives lost to illicit drugs since declaration of public health emergency [online]. BC Gov News. 2022 Aug 16.  
<https://news.gov.bc.ca/releases/2022PSSG0056-001250> (accessed 7 Sep 2022).

- 1  
2  
3 9. BC Coroners Service. Illicit drug toxicity type of drug data: data to August 31, 2022.  
4 Vancouver: Ministry of Public Safety & Solicitor General [online]. 2022 Sept 28, 2022.  
5 [https://www2.gov.bc.ca/assets/gov/birth-adoption-death-marriage-and-](https://www2.gov.bc.ca/assets/gov/birth-adoption-death-marriage-and-divorce/deaths/coroners-service/statistical/illicit-drug-type.pdf)  
6 [divorce/deaths/coroners-service/statistical/illicit-drug-type.pdf](https://www2.gov.bc.ca/assets/gov/birth-adoption-death-marriage-and-divorce/deaths/coroners-service/statistical/illicit-drug-type.pdf) (accessed 01 Oct 2022).  
7  
8  
9
- 10 10. BCCDC Harm Reduction Services. Information For Alerts and People Who Use Substances  
11 [online]. Toward the heart. <https://towardtheheart.com/alerts> (accessed 18 Oct 2022).  
12
- 13 11. BC Centre for Substance Use. Drug Checking [online]. BCCSU. [https://www.bccsu.ca/drug-](https://www.bccsu.ca/drug-checking/)  
14 [checking/](https://www.bccsu.ca/drug-checking/) (accessed 18 Oct 2022).  
15  
16
- 17 12. University of Victoria. Vancouver Island drug checking project [online]. UVic.  
18 <https://substance.uvic.ca/> (accessed 01 Oct 2022).  
19
- 20 13. Giné CV, Espinosa IF, Vilamala MV. New psychoactive substances as adulterants of  
21 controlled drugs. A worrying phenomenon? *Drug Testing and Analysis* 2014;**6**:819–24.  
22 doi:10.1002/dta.1610  
23
- 24 14. Toward The Heart. <https://towardtheheart.com/for-pwus> (accessed 26 Oct 2022).  
25
- 26 15. Kerr T, Small W, Hyshka E, *et al.* “It’s more about the heroin”: injection drug users’  
27 response to an overdose warning campaign in a Canadian setting. *Addiction* 2013;**108**:1270–  
28 6. doi:10.1111/add.12151  
29
- 30 16. Buxton JA, Spearn B, Amlani A, *et al.* The British Columbia Drug Overdose and Alert  
31 Partnership: Interpreting and sharing timely illicit drug information to reduce harms: *Journal*  
32 *of Community Safety and Well-Being* 2019;**4**:4–9. doi:10.35502/jcswb.92  
33
- 34 17. Nicol JJE, Yarema MC, Jones GR, *et al.* Deaths from exposure to  
35 paramethoxymethamphetamine in Alberta and British Columbia, Canada: a case series.  
36 *CMAJ Open* 2015;**3**:E83-90. doi:10.9778/cmajo.20140070  
37
- 38 18. Smit-Rigter LA, Van der Gouwe D. The neglected benefits of drug checking for harm  
39 reduction. *Internal Medicine Journal* 2020;**50**:1024–1024. doi:10.1111/imj.14953  
40
- 41 19. Keijsers L, Bossong MG, Waarlo AJ. Participatory evaluation of a Dutch warning campaign  
42 for substance-users. *Health, Risk & Society* 2008;**10**:283–95.  
43 doi:10.1080/13698570802160913  
44
- 45 20. Smit-Rigter LA, Van der Gouwe D. The drugs information and monitoring system (DIMS):  
46 Factsheet on drug checking in the Netherlands [online]. 2019.  
47  
48  
49  
50  
51  
52  
53  
54  
55  
56  
57  
58  
59  
60

- 1  
2  
3 <https://www.trimbos.nl/docs/cd3e9e11-9555-4f8c-b851-1806dfb47fd7.pdf> (accessed 22 Dec  
4 [2022](#)).
- 5  
6  
7 21. Kuo M, Shamsian A, Tzemis D, *et al*. A drug use survey among clients of harm reduction  
8 sites across British Columbia, Canada, 2012. *Harm Reduction Journal* 2014;**11**:13.  
9 doi:10.1186/1477-7517-11-13
- 10  
11  
12 22. Xavier J, Greer A, Pauly B, *et al*. “There are solutions and I think we’re still working in the  
13 problem”: The limitations of decriminalization under the good Samaritan drug overdose act  
14 and lessons from an evaluation in British Columbia, Canada. *Int J Drug Policy*  
15 2022;**105**:103714. doi:10.1016/j.drugpo.2022.103714
- 16  
17  
18 23. Song K, Buxton JA. Peer engagement in the BCCDC harm reduction program: A narrative  
19 summary [online]. Vancouver, BC: BC Centre for Disease Control. 2021. 12 p.  
20  
21 [https://www.llbc.leg.bc.ca/public/PubDocs/bcdocs2022/725438/725438\\_Peer\\_engagement\\_i](https://www.llbc.leg.bc.ca/public/PubDocs/bcdocs2022/725438/725438_Peer_engagement_in_the_BCCDC_harm_reduction_program.pdf)  
22 [n\\_the\\_BCCDC\\_harm\\_reduction\\_program.pdf](#) (accessed 22 Dec 2022).
- 23  
24  
25 24. Soukup-Baljak Y, Greer AM, Amlani A, *et al*. Drug quality assessment practices and  
26 communication of drug alerts among people who use drugs. *Int J Drug Policy*  
27 2015;**26**:1251–7. doi:10.1016/j.drugpo.2015.06.006
- 28  
29  
30 25. Bardwell G, Boyd J, Arredondo J, *et al*. Trusting the source: The potential role of drug  
31 dealers in reducing drug-related harms via drug checking. *Drug Alcohol Depend*  
32 2019;**198**:1–6. doi:10.1016/j.drugalcdep.2019.01.035
- 33  
34  
35 26. Loyal J, Buxton JA. Exploring the communication of drug alerts with people who use drugs  
36 and service providers [online]. Vancouver, BC: BC Centre for Disease Control. 2021. 35p.  
37  
38 [https://towardtheheart.com/assets/uploads/1637875132V20vRO8kYDO7akKH2KdKTOP5](https://towardtheheart.com/assets/uploads/1637875132V20vRO8kYDO7akKH2KdKTOP5wZtk8P70uMca4lP.pdf)  
39 [wZtk8P70uMca4lP.pdf](#) (accessed 22 Dec 2022).
- 40  
41  
42 27. Gunn CM, Maschke A, Harris M, *et al*. Age-based preferences for risk communication in  
43 the fentanyl era: “A lot of people keep seeing other people die and that’s not enough for  
44 them.” *Addiction* 2021;**116**:1495–504. doi:10.1111/add.15305
- 45  
46  
47 28. Mutlu-Bayraktar D. Evaluation of change blindness in multimedia learning environment  
48 with cognitive process. *Interactive Learning Environments* 2019;**27**:871–94.  
49  
50 doi:10.1080/10494820.2018.1530682
- 51  
52  
53 29. Simons DJ, Rensink RA. Change blindness: past, present, and future. *Trends in Cognitive*  
54 *Sciences* 2005;**9**:16–20. doi:10.1016/j.tics.2004.11.006
- 55  
56  
57  
58  
59  
60



- 1  
2  
3 30. Harris MTH, Bagley SM, Maschke A, *et al.* Competing risks of women and men who use  
4 fentanyl: “The number one thing I worry about would be my safety and number two would  
5 be overdose.” *J Subst Abuse Treat* 2021;**125**:108313. doi:10.1016/j.jsat.2021.108313  
6  
7  
8  
9  
10  
11  
12  
13  
14  
15  
16  
17  
18  
19  
20  
21  
22  
23  
24  
25  
26  
27  
28  
29  
30  
31  
32  
33  
34  
35  
36  
37  
38  
39  
40  
41  
42  
43  
44  
45  
46  
47  
48  
49  
50  
51  
52  
53  
54  
55  
56  
57  
58  
59  
60

For peer review only

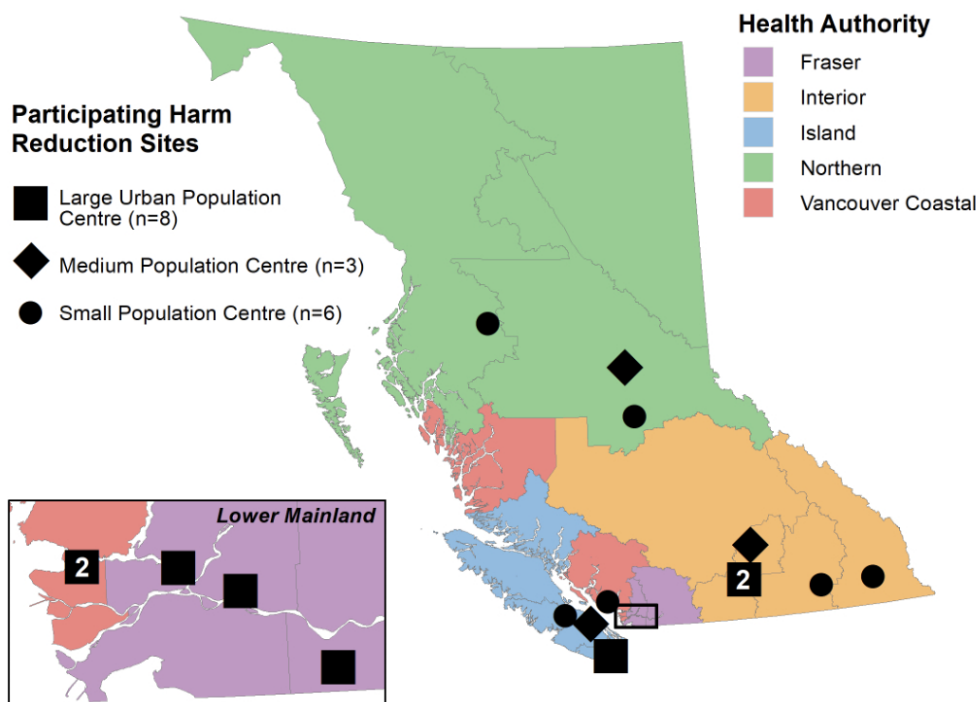

**Fig.1.** Map of sites participating in 2021 Harm Reduction Client Survey

Map of sites participating in 2021 Harm Reduction Client Survey

181x153mm (144 x 144 DPI)

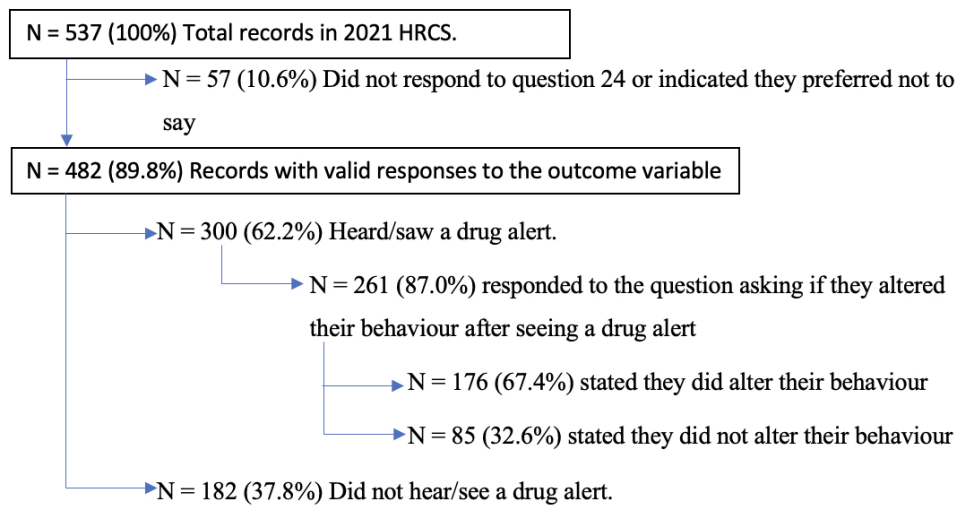

**Fig. 2.** Summary of responses to the outcome variables of interest.

Summary of responses to the outcome variable of interest

196x115mm (144 x 144 DPI)

STROBE Statement—Checklist of items that should be included in reports of *cross-sectional studies*

|                              | Item No | Recommendation                                                                                                                                                                                                                                                                                                                                                                                                             |
|------------------------------|---------|----------------------------------------------------------------------------------------------------------------------------------------------------------------------------------------------------------------------------------------------------------------------------------------------------------------------------------------------------------------------------------------------------------------------------|
| <b>Title and abstract</b>    | 1       | (a) Indicate the study's design with a commonly used term in the title or the abstract (p 1)<br>(b) Provide in the abstract an informative and balanced summary of what was done and what was found (p 2)                                                                                                                                                                                                                  |
| <b>Introduction</b>          |         |                                                                                                                                                                                                                                                                                                                                                                                                                            |
| Background/rationale         | 2       | Explain the scientific background and rationale for the investigation being reported (p 3)                                                                                                                                                                                                                                                                                                                                 |
| Objectives                   | 3       | State specific objectives, including any prespecified hypotheses (p 6)                                                                                                                                                                                                                                                                                                                                                     |
| <b>Methods</b>               |         |                                                                                                                                                                                                                                                                                                                                                                                                                            |
| Study design                 | 4       | Present key elements of study design early in the paper (p 6)                                                                                                                                                                                                                                                                                                                                                              |
| Setting                      | 5       | Describe the setting, locations, and relevant dates, including periods of recruitment, exposure, follow-up, and data collection (p 6)                                                                                                                                                                                                                                                                                      |
| Participants                 | 6       | (a) Give the eligibility criteria, and the sources and methods of selection of participants (p 7)                                                                                                                                                                                                                                                                                                                          |
| Variables                    | 7       | Clearly define all outcomes, exposures, predictors, potential confounders, and effect modifiers. Give diagnostic criteria, if applicable (p 7)                                                                                                                                                                                                                                                                             |
| Data sources/<br>measurement | 8*      | For each variable of interest, give sources of data and details of methods of assessment (measurement). Describe comparability of assessment methods if there is more than one group                                                                                                                                                                                                                                       |
| Bias                         | 9       | Describe any efforts to address potential sources of bias                                                                                                                                                                                                                                                                                                                                                                  |
| Study size                   | 10      | Explain how the study size was arrived at (p 7)                                                                                                                                                                                                                                                                                                                                                                            |
| Quantitative variables       | 11      | Explain how quantitative variables were handled in the analyses. If applicable, describe which groupings were chosen and why (p 8)                                                                                                                                                                                                                                                                                         |
| Statistical methods          | 12      | (a) Describe all statistical methods, including those used to control for confounding (p 8)<br>(b) Describe any methods used to examine subgroups and interactions (p 8)<br>(c) Explain how missing data were addressed<br>(d) If applicable, describe analytical methods taking account of sampling strategy (p 8)<br>(e) Describe any sensitivity analyses                                                               |
| <b>Results</b>               |         |                                                                                                                                                                                                                                                                                                                                                                                                                            |
| Participants                 | 13*     | (a) Report numbers of individuals at each stage of study—eg numbers potentially eligible, examined for eligibility, confirmed eligible, included in the study, completing follow-up, and analysed (p 10)<br>(b) Give reasons for non-participation at each stage (p 10)<br>(c) Consider use of a flow diagram (p 10)                                                                                                       |
| Descriptive data             | 14*     | (a) Give characteristics of study participants (eg demographic, clinical, social) and information on exposures and potential confounders (p 10)<br>(b) Indicate number of participants with missing data for each variable of interest (p 10)                                                                                                                                                                              |
| Outcome data                 | 15*     | Report numbers of outcome events or summary measures (p 10)                                                                                                                                                                                                                                                                                                                                                                |
| Main results                 | 16      | (a) Give unadjusted estimates and, if applicable, confounder-adjusted estimates and their precision (eg, 95% confidence interval). Make clear which confounders were adjusted for and why they were included (p 13)<br>(b) Report category boundaries when continuous variables were categorized (p 7)<br>(c) If relevant, consider translating estimates of relative risk into absolute risk for a meaningful time period |
| Other analyses               | 17      | Report other analyses done—eg analyses of subgroups and interactions, and sensitivity analyses (p 10, 13)                                                                                                                                                                                                                                                                                                                  |

**Discussion**

|                  |    |                                                                                                                                                                                   |
|------------------|----|-----------------------------------------------------------------------------------------------------------------------------------------------------------------------------------|
| Key results      | 18 | Summarise key results with reference to study objectives (p 15)                                                                                                                   |
| Limitations      | 19 | Discuss limitations of the study, taking into account sources of potential bias or imprecision. Discuss both direction and magnitude of any potential bias (p 16)                 |
| Interpretation   | 20 | Give a cautious overall interpretation of results considering objectives, limitations, multiplicity of analyses, results from similar studies, and other relevant evidence (p 16) |
| Generalisability | 21 | Discuss the generalisability (external validity) of the study results (p 16)                                                                                                      |

**Other information**

|         |    |                                                                                                                                                                      |
|---------|----|----------------------------------------------------------------------------------------------------------------------------------------------------------------------|
| Funding | 22 | Give the source of funding and the role of the funders for the present study and, if applicable, for the original study on which the present article is based (p 18) |
|---------|----|----------------------------------------------------------------------------------------------------------------------------------------------------------------------|

\*Give information separately for exposed and unexposed groups.

**Note:** An Explanation and Elaboration article discusses each checklist item and gives methodological background and published examples of transparent reporting. The STROBE checklist is best used in conjunction with this article (freely available on the Web sites of PLoS Medicine at <http://www.plosmedicine.org/>, Annals of Internal Medicine at <http://www.annals.org/>, and Epidemiology at <http://www.epidem.com/>). Information on the STROBE Initiative is available at [www.strobe-statement.org](http://www.strobe-statement.org).

# BMJ Open

## Awareness, Predictors, and Outcomes of Drug Alerts Among People Who Access Harm Reduction Services in British Columbia, Canada: Findings from a 2021 Cross-Sectional Survey

|                                 |                                                                                                                                                                                                                                                                                                                                                                                                                                                                                                                                                                                                                                                                                                        |
|---------------------------------|--------------------------------------------------------------------------------------------------------------------------------------------------------------------------------------------------------------------------------------------------------------------------------------------------------------------------------------------------------------------------------------------------------------------------------------------------------------------------------------------------------------------------------------------------------------------------------------------------------------------------------------------------------------------------------------------------------|
| Journal:                        | <i>BMJ Open</i>                                                                                                                                                                                                                                                                                                                                                                                                                                                                                                                                                                                                                                                                                        |
| Manuscript ID                   | bmjopen-2022-071379.R1                                                                                                                                                                                                                                                                                                                                                                                                                                                                                                                                                                                                                                                                                 |
| Article Type:                   | Original research                                                                                                                                                                                                                                                                                                                                                                                                                                                                                                                                                                                                                                                                                      |
| Date Submitted by the Author:   | 04-Apr-2023                                                                                                                                                                                                                                                                                                                                                                                                                                                                                                                                                                                                                                                                                            |
| Complete List of Authors:       | Daowd, Kerolos; The University of British Columbia Faculty of Medicine<br>Ferguson, Max; BC Centre for Disease Control, Harm Reduction<br>Liu, Lisa; BC Centre for Disease Control, Harm Reduction<br>Loyal, Jackson; BC Centre for Disease Control, Harm Reduction; Simon Fraser University<br>Lock, Kurt; BC Centre for Disease Control, Harm Reduction<br>Graham, Brittany; BC Centre for Disease Control, Harm Reduction<br>Lamb, Jessica; BC Centre for Disease Control, Harm Reduction<br>McDougall, Jenny; BC Centre for Disease Control, Harm Reduction<br>Buxton, Jane; BC Centre for Disease Control, Harm Reduction; University of British Columbia, School of Population and Public Health |
| <b>Primary Subject Heading</b>: | Addiction                                                                                                                                                                                                                                                                                                                                                                                                                                                                                                                                                                                                                                                                                              |
| Secondary Subject Heading:      | Public health                                                                                                                                                                                                                                                                                                                                                                                                                                                                                                                                                                                                                                                                                          |
| Keywords:                       | PUBLIC HEALTH, EPIDEMIOLOGY, Health policy < HEALTH SERVICES ADMINISTRATION & MANAGEMENT                                                                                                                                                                                                                                                                                                                                                                                                                                                                                                                                                                                                               |
|                                 |                                                                                                                                                                                                                                                                                                                                                                                                                                                                                                                                                                                                                                                                                                        |

SCHOLARONE™  
Manuscripts



I, the Submitting Author has the right to grant and does grant on behalf of all authors of the Work (as defined in the below author licence), an exclusive licence and/or a non-exclusive licence for contributions from authors who are: i) UK Crown employees; ii) where BMJ has agreed a CC-BY licence shall apply, and/or iii) in accordance with the terms applicable for US Federal Government officers or employees acting as part of their official duties; on a worldwide, perpetual, irrevocable, royalty-free basis to BMJ Publishing Group Ltd ("BMJ") its licensees and where the relevant Journal is co-owned by BMJ to the co-owners of the Journal, to publish the Work in this journal and any other BMJ products and to exploit all rights, as set out in our [licence](#).

The Submitting Author accepts and understands that any supply made under these terms is made by BMJ to the Submitting Author unless you are acting as an employee on behalf of your employer or a postgraduate student of an affiliated institution which is paying any applicable article publishing charge ("APC") for Open Access articles. Where the Submitting Author wishes to make the Work available on an Open Access basis (and intends to pay the relevant APC), the terms of reuse of such Open Access shall be governed by a Creative Commons licence – details of these licences and which [Creative Commons](#) licence will apply to this Work are set out in our licence referred to above.

Other than as permitted in any relevant BMJ Author's Self Archiving Policies, I confirm this Work has not been accepted for publication elsewhere, is not being considered for publication elsewhere and does not duplicate material already published. I confirm all authors consent to publication of this Work and authorise the granting of this licence.

1  
2  
3 **Awareness, Predictors, and Outcomes of Drug Alerts Among People Who Access Harm**  
4 **Reduction Services in British Columbia, Canada: Findings from a 2021 Cross-Sectional**  
5 **Survey**  
6  
7  
8  
9

10 **Authors:**

11 Kerolos Daowd,<sup>1</sup> Max Ferguson,<sup>2</sup> Lisa Liu,<sup>2</sup> Jackson Loyal,<sup>2,3</sup> Kurt Lock,<sup>2</sup> Brittany Graham,<sup>2</sup>  
12 Jessica Lamb,<sup>2</sup> Jenny McDougall,<sup>2</sup> Jane A Buxton<sup>2,4</sup>  
13  
14

15 <sup>1</sup>Faculty of Medicine, University of British Columbia, Canada

16 <sup>2</sup>British Columbia Centre for Disease Control, Vancouver, BC, Canada

17 <sup>3</sup>Centre for Applied Research in Mental Health and Addiction, Simon Fraser University, BC  
18 Canada

19 <sup>4</sup>School of Population and Public Health, University of British Columbia, Canada  
20  
21  
22

23 **Correspondence** to Dr. Jane Buxton; jane.buxton@ubc.ca  
24  
25

26 **Addresses**

- 27 • Faculty of Medicine, University of British Columbia, 317-2194 Health Sciences Mall, Vancouver BC V6T 1Z3
- 28 • British Columbia Centre for Disease Control, 655 W 12th Ave, Vancouver, BC V5Z 4R4, Canada.
- 29 • Centre for Applied Research in Mental Health and Addiction, Simon Fraser University, 2400 515 W  
30 Hastings St, Vancouver, BC V6B 5K3, Canada.
- 31 • School of Population and Public Health, University of British Columbia, 2206 E Mall, Vancouver, BC V6T  
32 1Z8, Canada.
- 33
- 34
- 35
- 36
- 37
- 38
- 39
- 40
- 41
- 42
- 43
- 44
- 45
- 46
- 47
- 48
- 49
- 50
- 51
- 52
- 53
- 54
- 55
- 56
- 57
- 58
- 59
- 60



## ABSTRACT

**Objectives:** To assess the awareness and predictors of seeing/hearing a drug alert in British Columbia (BC) and subsequent drug use behaviour after seeing/hearing an alert.

**Methods:** This study analyzed the 2021 BC Harm Reduction Client Survey (HRCS) – a cross-sectional self-reported survey administered at harm reduction sites throughout the province and completed by participants using the services.

**Results:** In total, N = 537 respondents participated and N = 482 (89.8%) responded to the question asking if they saw/heard a drug alert. Of those, N = 300 (62.2%) stated they saw/heard a drug alert and almost half reported hearing from a friend or peer network; the majority (67.4%) reported altering their drug use behaviour to be safer after seeing/hearing a drug alert. The proportion of individuals who saw/heard a drug alert increased with each ascending age category. Amongst health authorities there were significant differences in the odds of seeing/hearing an alert. In the past 6 months, the odds of participants that attended harm reduction sites a few times per month seeing/hearing an alert were 2.73 (95% CI: 1.17-6.52) times the odds of those who did not. Those who attended more frequently were less likely to report seeing/hearing a drug alert. The odds of those who witnessed an opioid-related overdose in the past 6 months seeing/hearing an alert were 1.96 (95% CI: 0.86-4.50) times the odds of those who had not.

**Conclusion:** We found that drug alerts were mostly disseminated through communication with friends or peers and that most participants altered their drug use behaviour after seeing/hearing a drug alert. Therefore, drug alerts can play a role in reducing harms from substance use and more work is needed to reach diverse populations, such as younger people, those in differing geographical locations, and those who attend harm reduction sites more frequently.

**Keywords:** Harm reduction, opioid epidemic, public health, epidemiology

## ARTICLE SUMMARY

### Strengths and Limitations of this Study

- Provides insight into the lived and living experiences of PWUD.
- Identifies strengths and weaknesses in the communication of drug alerts.
- Enhances our understanding of the efficacy of drug alerts and the effect on drug use behaviour.

- Uses cross-sectional data, thus, preventing establishment of temporal relationships.
- Not representative of all PWUD, only those who attend harm reduction sites.

For peer review only

## INTRODUCTION

More than 100,000 drug overdose deaths were identified in the United States in 2021 (1). In Canada, 32,632 opioid toxicity deaths were reported between January 2016 and March 2022 (2). During the same time period 33,493 opioid-related and 14,606 stimulant-related poisoning hospitalizations were reported (3). In addition to the strain put on hospitals, emergency first responders are also challenged to respond to the effects of toxic drug supply. In 2021, there were more than 41,600 Emergency Medical Services responses to suspected opioid-related overdoses in Canada (4).

These challenges are not limited to healthcare professionals. The COVID-19 pandemic and public health measures such as physical distancing introduced to prevent virus transmission further exacerbated this complex issue. As harm reduction services became less available and overdoses increased, peers (people with lived experience of substance use who use that experience in their work) took on a greater burden of supporting people who use drugs (5).

B.C. declared a public health emergency in April 2016 in response to increasing overdoses fuelled by fentanyl (6). B.C. has the highest rate of opioid-related overdoses of all provinces, in 2021 B.C. reported 2,267 illicit drug toxicity deaths, the highest annual number of deaths ever reported (7). In August 2022, the BC Coroners Service reported reaching the tragic milestone of 10,000 lives lost to the toxic drug supply since the public health emergency was declared (8). Post-mortem toxicology in B.C. has detected fentanyl or its analogues in more than 80% of deaths since 2017 (9). The proportion of cases where benzodiazepines were detected in decedents increased from 15% in July 2020 to 52% in January 2022 (9). In addition, identification of extreme fentanyl concentrations (>50micrograms/litre) doubled from 8% of decedents January 2019 to March 2020 to 16% November 2021 to August 2022 (9). Drug toxicity deaths are preventable, and advocates are calling for improved policies, treatment and harm reduction measures to support and provide resources to people who use drugs (PWUD) (5).

Initiatives to address the illicit drug toxicity crisis in B.C. include the implementation and expansion of harm reduction services such as opioid agonist treatment, take-home naloxone kits,

1  
2  
3 supervised consumption and overdose prevention sites, and drug checking. Another strategy is  
4 the use of drug alerts to warn PWUD, members of the public, and service providers about the  
5 current risks of the circulating drug supply. In 2020, there were 160 drug alerts issued in B.C., a  
6 few alerts were province wide but most were disseminated to a specific region or town, with  
7 more than half implicating fentanyl as a concern (10). Alerts may be disseminated when harms  
8 are identified following the use of an unknown substance, or when analyses of substances  
9 identify a particular drug, combination of drugs or drug concentration of concern. Timely  
10 identification is often through drug checking services which are increasingly available across  
11 B.C., such as those provided through and in partnership with the BC Centre on Substance Use  
12 (11) and the Vancouver Island Drug Checking Project (12). Analysis of enforcement samples  
13 and decedent toxicology supplement this information but is usually delayed and thus not  
14 appropriate for timely drug alerts.  
15  
16  
17  
18  
19  
20  
21  
22  
23  
24  
25

26 Drug alerts are distributed through different forms of media, including provincial, regional,  
27 and harm reduction service websites; social media and social networks; as well as being  
28 distributed through outreach activities including posters and word of mouth (13). The content of  
29 drug alerts varies from general warnings about drug use to specific details related to a single drug  
30 – details may include different names it is being sold under, colour, form, and area where it is  
31 believed to be circulating. Alerts developed and distributed by B.C. health authorities are  
32 collated by the BC Centre for Disease Control and published on the public website  
33 towardtheheart.com (14).  
34  
35  
36  
37  
38  
39  
40  
41

42 Drug alerts provide an opportunity to provide life-saving information quickly and  
43 efficiently. B.C. health authorities and community organizations utilize different methods to  
44 distribute drug alerts in order to reach PWUD who use a variety of information sources. There  
45 are also important considerations for disseminating drug alerts as well. For example, language  
46 matters when issuing information related to the circulating drug supply. Information that may  
47 warn individuals about a drug's potency may lead individuals to seek out this drug because of its  
48 stronger effect (15). Furthermore, drug alerts need to focus on maintaining human dignity and  
49 respecting a person's autonomy while being informative and clear.  
50  
51  
52  
53  
54  
55  
56  
57  
58  
59  
60

1  
2  
3 Notably, drug alerts are intended to reach individuals responsible for manufacturing the  
4 substance(s) as well as those using them. In 2012, the B.C. Drug Overdose and Alert Partnership  
5 (DOAP) issued alerts provincially and locally when paramethoxymethamphetamine (PMMA), a  
6 toxic substance, was identified in people who died after using what they believed was ecstasy  
7 (16, 17). Drug alerts are also being used globally, such as in the Netherlands, where there was an  
8 observed association between drug alerts and reduced drug-associated adverse health outcomes,  
9 compared to jurisdictions not using drug alerts (18-20).  
10  
11  
12  
13  
14  
15

16  
17 Our study analyzed data from the 2021 BC Harm Reduction Client Survey (HRCS), which  
18 sampled people using harm reduction supply distribution sites around the province. Our aim was  
19 to determine the characteristics of who reported seeing/hearing drug alerts, where they saw/heard  
20 the alerts and if they reported safer use when they saw/heard an alert in order to improve the  
21 alerting process.  
22  
23  
24  
25

## 26 27 28 **MATERIALS AND METHODS**

### 29 **Data Source**

30  
31 The 2021 BC HRCS gathered information on substance use patterns, associated harms,  
32 stigma, and utilization of harm reduction services to inform harm reduction planning and to  
33 evaluate current practices (21). The cross-sectional HRCS was piloted in 2012 and has been  
34 administered annually since (except 2016, 2017 and 2020). Each iteration of the survey contains  
35 questions relevant to emerging issues and the priorities of stakeholders. Stakeholders, including  
36 PWUD, provided input and piloted questions on awareness of drug alerts included in the 2021  
37 HRCS. Locations for data collection were selected from a provincial network of sites that  
38 distribute supplies for safer substance use, using two-stage convenience sampling. Harm  
39 reduction program coordinators from each regional health authority identified potential sites for  
40 participation; sites were then recruited based on willingness to participate and their capacity for  
41 recruitment and data collection. In total, 17 harm reduction sites participated in the 2021 HRCS  
42 between March 2021 and January 2022. Trained site staff and volunteers recruited participants  
43 who received \$15 CAD and the sites received \$5 CAD per participant recruited. The anonymous  
44 paper-based survey took approximately 20 minutes to complete and participants are informed  
45 that they may only complete the survey once.  
46  
47  
48  
49  
50  
51  
52  
53  
54  
55  
56  
57  
58  
59  
60

1  
2  
3 The eligibility criteria for participants included: being 19 years of age or older, having used  
4 or currently using any illegal substance(s) other than or in addition to cannabis in the past 6  
5 months, and being able to provide verbal informed consent. Data entry and analysis occurred at  
6 the British Columbia Center for Disease Control (BCCDC) in Vancouver, B.C. Data collection  
7 methods have been described elsewhere (10).  
8  
9  
10  
11  
12

### 13 **Study Variables**

14  
15 We assessed who reported recently seeing/hearing a drug alert and associations with  
16 demographic and drug use data from responses to the question “*have you recently seen or heard*  
17 *an alert about recent drug overdoses, toxic drugs found e.g., from drug checking/testing and*  
18 *other possible issues with street drugs?*” We thematically analysed responses to the question  
19 “*where did you notice these alerts?*” We assessed if seeing/hearing a drug alert led participants  
20 to report using drugs more safely by the response to “*Do you take any steps to be safer (get*  
21 *drugs checked/tested, use overdose prevention sites, use with a buddy etc.) when you see an alert*  
22 *about drugs you may use?*”  
23  
24  
25  
26  
27  
28  
29  
30

31 Demographic and drug use variables included: B.C. health authority (Fraser, Interior,  
32 Island, Northern, and Vancouver Coastal) and urbanicity (large urban, medium and small  
33 population centres) of the site where the survey was administered (see Fig. 1), age category ( $\leq 29$ ,  
34 30-39, 40-49,  $\geq 50$ , unknown), gender (cis woman, cis man, trans and gender expansive,  
35 unknown), self-reported Indigenous identity (First Nations, Métis, Inuit, non-Indigenous,  
36 unknown), employment status (employed [working full-time, part-time or paid volunteer], not  
37 employed, unknown), housing status (stably housed [living in a private residence or living in  
38 another residence - hotel/motel, rooming houses, single room occupancy, or social/supportive  
39 housing]), not stably housed [living in a shelter or having no regular place to stay -homeless,  
40 couch surfing, no fixed address], unknown), how frequently the client picked up supplies from a  
41 harm reduction site in the last six months (never, every day, few times per week, few times per  
42 month, once a month or less, unknown), had a cell phone (yes, no, unknown), had a naloxone kit  
43 (yes, no, unknown), used an overdose prevention site in the past 6 months (yes, no, unknown),  
44 perceived risk of overdose from opioid (yes, no, don't know, unknown), injected any drug in the  
45 past 6 months (yes, no, unknown), frequency of drug use in the past month (none, every day, few  
46  
47  
48  
49  
50  
51  
52  
53  
54  
55  
56  
57  
58  
59  
60

1  
2  
3 times per week, few times per month, prefer not to say), witnessed or experienced an opioid  
4 overdose in the last 6 months (yes, no, don't know, unknown). Variables that had 'prefer not to  
5 say' and 'unknown' were combined into 'unknown'. Urbanicity was derived using the  
6 Population and Rural Area Classification 2016 system developed from Statistics Canada.  
7  
8  
9

10  
11  
12  
13  
14 **Fig.1.** Map of sites participating in 2021 Harm Reduction Client Survey  
15

## 16 17 18 19 20 **Statistical Analysis**

21  
22 Descriptive statistics and bivariable analyses with chi-square tests of independence were  
23 conducted for all variables to describe characteristics of PWUD that responded to having seen or  
24 heard of a drug alert (Table 1). Bivariate logistic regression assessing the relationship between  
25 explanatory variables and the outcome variable was conducted for all variables (Table 1). A  
26 Cochran-Armitage trend test was performed to assess for a trend between age category and the  
27 awareness of drug alerts.  
28  
29  
30  
31  
32  
33

34  
35 Based on purposeful model building, all covariates with at least one level with a p-value of  
36 0.25 or less in bivariable regression were assessed for inclusion in the final model. In addition,  
37 owning a cellphone was included for assessment in the model despite having a p-value greater  
38 than 0.25 because conceptually it is believed that having regular access to communication and  
39 the internet increases the likelihood of seeing a drug alert. After developing the full model, we  
40 used backwards selection and Akaike Information Criterion (AIC) to determine which covariates  
41 to include in the final model. Although gender was not statistically significant in the bivariable  
42 regression, it was included in the model because of the known effects on health outcomes. We  
43 used variance inflation factor (VIF) to assess for collinearity and no VIF was above 4; as such,  
44 no further investigation was required, and all covariates of interest remained in the model.  
45  
46  
47  
48  
49  
50  
51  
52  
53

54 In developing the multivariable logistic regression model, we assessed the following  
55 variables as candidates for inclusion in the final model: age category; gender; health authority;  
56  
57  
58  
59  
60

1  
2  
3 urbanicity; owning a cellphone; owning a naloxone kit; Indigenous identity; perceived risk of  
4 opioid overdose; injecting any drug in the past 6 months; frequency of substance use in the past  
5 month other than or in addition to cannabis, alcohol, or tobacco; experiencing an unintentional  
6 opioid overdose in the past 6 months; witnessing an accidental opioid overdose in the past 6  
7 months; use of an overdose prevention site in the past 6 months; and frequency of harm  
8 reduction supply pick up in the last 6 months.  
9  
10  
11  
12  
13  
14

15  
16 Using backwards selection based on which model resulted in the smaller AIC value, we  
17 retained the following variables in the final model: age category, gender, health authority,  
18 frequency of harm reduction supply pick up in the past 6 months, and witnessing an opioid-  
19 related overdose in the past 6 months. Age category and gender were included despite not being  
20 selected for using backwards selection because of their conceptual relevance and known  
21 differences in health outcomes.  
22  
23  
24  
25  
26  
27

28 Adjusted odds ratios (AOR) and 95% confidence intervals (95% CI) were included in the  
29 final multivariable logistic regression model. Odds ratios with a p-value  $\leq 0.05$  were considered  
30 statistically significant. We used R version 4.2.0 (2022-04-22) and R Studio version  
31 2022.2.3.492 to conduct all analyses.  
32  
33  
34  
35  
36  
37

### 38 **Patient and Public Involvement**

39  
40 To ensure our analyses represent the realities of PWUD, we consulted the Professionals for  
41 Ethical Engagement of Peers (PEEP) – an advisory group of leaders with past or current illicit  
42 drug use – on our analyses and interpretations (22, 23).  
43  
44  
45  
46  
47  
48  
49

## 50 **RESULTS**

51  
52 Surveys were completed by 537 eligible participants from across B.C. and 482 (89.8%)  
53 participants had valid responses to the question “*have you recently seen or heard an alert?*” and  
54 were included in our analysis, of these 300 (62.2%) stated they saw/heard an alert (see Fig. 2)  
55  
56  
57  
58  
59  
60



1  
2  
3 Of the 261 participants who responded to the question asking if they took steps to be safer  
4 when using substances after seeing/hearing a drug alert, 176 (67.4%) reported they did  
5 subsequently take safer steps (Fig. 2).  
6  
7  
8  
9  
10

11 **Fig. 2.** Summary of responses to the outcome variables of interest.  
12  
13

14 Table 1 shows the characteristics of respondents. A third of respondents were  $\geq 50$  years  
15 old and the distribution across urbanicity categories of the site where they participated in the  
16 survey were fairly even (29.5% were from small urban centers; 36.1% from medium urban  
17 centers and 34.4% from large urban centers). Most respondents were cis men (62.2%), had used  
18 an overdose prevention site in the past 6 months (67.2%), did not perceive themselves at risk of  
19 an opioid overdose (58.7%), used drugs daily in the past month (66.4%), had not experienced an  
20 opioid overdose in the past 6 months (69.3%), and had witnessed an overdose due to opioids in  
21 the past 6 months (65.4%). Interior was used as the health authority reference category as it had  
22 the largest sample size. With respect to age categories, a Cochran-Armitage trend test indicated  
23 that there was an increasing trend with known age and the observation of a drug alert ( $p < 0.03$ ).  
24  
25  
26  
27  
28  
29  
30  
31  
32  
33  
34  
35  
36  
37  
38  
39  
40  
41  
42  
43  
44  
45  
46  
47  
48  
49  
50  
51  
52  
53  
54  
55  
56  
57  
58  
59  
60

**Table 1: Characteristics of 2021 Harm Reduction Client Survey Participants that Responded to Seeing/Hearing a Drug Alert (N = 482)**

| Characteristics                                            | Saw/heard alert<br>(n=300)<br>n (%) | Did not see/hear<br>alert (n=182)<br>n (%) | Total (n= 482)<br>n (%) | Chi-Square<br>P-value | Bivariable<br>Regression<br>P-value |
|------------------------------------------------------------|-------------------------------------|--------------------------------------------|-------------------------|-----------------------|-------------------------------------|
| <i>Demographics:</i>                                       |                                     |                                            |                         |                       |                                     |
| <b>Age category</b>                                        |                                     |                                            |                         | 0.46                  |                                     |
| ≤ 29                                                       | 34 (53.1)                           | 30 (46.9)                                  | 64 (13.3)               |                       | Reference                           |
| 30-39                                                      | 72 (61.0)                           | 46 (39.0)                                  | 118 (24.5)              |                       | 0.30                                |
| 40-49                                                      | 81 (63.3)                           | 47 (36.7)                                  | 128 (26.6)              |                       | 0.18                                |
| ≥ 50                                                       | 102 (64.2)                          | 57 (35.8)                                  | 159 (33.0)              |                       | 0.13                                |
| Unknown                                                    | 11 (84.6)                           | 2 (15.4)                                   | 13 (2.6)                |                       | 0.050                               |
| <b>Gender</b>                                              |                                     |                                            |                         | 0.059                 |                                     |
| Cis man                                                    | 183 (61.0)                          | 117 (39.0)                                 | 300 (62.2)              |                       | Reference                           |
| Cis woman                                                  | 104 (62.7)                          | 62 (37.3)                                  | 166 (34.4)              |                       | 0.73                                |
| Trans and gender expansive*                                | 9 (100.0)                           | 0 (0.0)                                    | 9 (1.9)                 |                       | 0.98                                |
| Unknown                                                    | 4 (57.1)                            | 3 (42.9)                                   | 7 (1.5)                 |                       | 0.84                                |
| <b>Health Authority</b>                                    |                                     |                                            |                         | 0.041                 |                                     |
| Fraser                                                     | 52 (61.2)                           | 33 (38.8)                                  | 85 (17.6)               |                       | 0.61                                |
| Interior                                                   | 75 (57.7)                           | 55 (42.3)                                  | 130 (27.0)              |                       | Reference                           |
| Island                                                     | 81 (70.4)                           | 34 (29.6)                                  | 115 (23.9)              |                       | 0.039                               |
| Northern                                                   | 44 (52.4)                           | 40 (47.6)                                  | 84 (17.4)               |                       | 0.45                                |
| Vancouver Coastal                                          | 48 (70.6)                           | 20 (29.4)                                  | 68 (14.1)               |                       | 0.077                               |
| <b>Urbanicity</b>                                          |                                     |                                            |                         | 0.99                  |                                     |
| Large urban                                                | 103 (62.0)                          | 63 (38.0)                                  | 166 (34.4)              |                       | Reference                           |
| Medium urban                                               | 108 (62.1)                          | 66 (37.9)                                  | 174 (36.1)              |                       | 1.00                                |
| Small urban                                                | 89 (62.7)                           | 53 (37.3)                                  | 142 (29.5)              |                       | 0.91                                |
| <b>Indigenous Identity</b>                                 |                                     |                                            |                         | 0.27                  |                                     |
| Non-Indigenous                                             | 164 (65.5)                          | 86 (34.5)                                  | 250 (51.9)              |                       | Reference                           |
| Indigenous                                                 | 117 (57.4)                          | 87 (42.6)                                  | 204 (42.3)              |                       | 0.072                               |
| Unknown                                                    | 19 (67.9)                           | 9 (32.1)                                   | 28 (5.8)                |                       | 0.81                                |
| <b>Current employment**</b>                                |                                     |                                            |                         | 0.65                  |                                     |
| Unemployed                                                 | 219 (61.3)                          | 138 (38.7)                                 | 357 (74.1)              |                       | Reference                           |
| Employed                                                   | 67 (64.4)                           | 37 (35.6)                                  | 104 (21.6)              |                       | 0.57                                |
| Unknown                                                    | 14 (66.7)                           | 7 (33.3)                                   | 21 (4.3)                |                       | 0.63                                |
| <b>Currently stably housed***</b>                          |                                     |                                            |                         | 0.88                  |                                     |
| Yes                                                        | 175 (62.7)                          | 104 (37.3)                                 | 279 (57.9)              |                       | Reference                           |
| No                                                         | 111 (61.3)                          | 70 (38.7)                                  | 181 (37.6)              |                       | 0.76                                |
| Unknown                                                    | 14 (63.6)                           | 8 (34.4)                                   | 22 (4.5)                |                       | 0.93                                |
| <i>Harm Reduction (HR) Characteristics:</i>                |                                     |                                            |                         |                       |                                     |
| <b>Frequency of HR supply pick up in the past 6 months</b> |                                     |                                            |                         | 0.061                 |                                     |
| Never                                                      | 15 (41.7)                           | 21 (58.3)                                  | 36 (7.5)                |                       | Reference                           |
| Every day                                                  | 84 (65.6)                           | 44 (34.4)                                  | 128 (26.6)              |                       | 0.011                               |
| Few times/week                                             | 107 (61.1)                          | 68 (38.9)                                  | 175 (36.3)              |                       | 0.034                               |
| Few times/mo                                               | 58 (67.4)                           | 28 (32.6)                                  | 86 (17.8)               |                       | 0.0092                              |
| Once a month or less                                       | 25 (69.4)                           | 11 (30.6)                                  | 36 (7.5)                |                       | 0.019                               |
| Unknown                                                    | 11 (52.4)                           | 10 (47.6)                                  | 21 (4.3)                |                       | 0.44                                |
| <b>Have a cell phone</b>                                   |                                     |                                            |                         | 0.51                  |                                     |
| No                                                         | 121 (60.2)                          | 80 (39.8)                                  | 201 (41.7)              |                       | Reference                           |
| Yes                                                        | 161 (63.6)                          | 92 (36.4)                                  | 253 (52.5)              |                       | 0.45                                |
| Unknown                                                    | 18 (64.3)                           | 10 (35.7)                                  | 28 (5.8)                |                       | 0.68                                |
| <b>Have a naloxone kit</b>                                 |                                     |                                            |                         | 0.014                 |                                     |
| No                                                         | 47 (50.5)                           | 46 (49.5)                                  | 93 (19.3)               |                       | Reference                           |
| Yes                                                        | 242 (65.2)                          | 130 (34.8)                                 | 372 (77.2)              |                       | 0.010                               |
| Unknown                                                    | 11 (64.7)                           | 6 (35.3)                                   | 17 (3.5)                |                       | 0.29                                |
| <b>Used overdose prevention site in</b>                    |                                     |                                            |                         | 0.011                 |                                     |

|                                                            |            |            |            |          |           |
|------------------------------------------------------------|------------|------------|------------|----------|-----------|
| <b>the last 6 months</b>                                   |            |            |            |          |           |
| No                                                         | 191 (59.0) | 133 (41.0) | 324 (67.2) |          | Reference |
| Yes                                                        | 96 (72.2)  | 37 (27.8)  | 133 (27.6) |          | 0.0083    |
| Unknown                                                    | 13 (52.)   | 12 (48.0)  | 25 (5.2)   |          | 0.50      |
| <i>Drug Use Characteristics:</i>                           |            |            |            |          |           |
| <b>Perceived risk of opioid OD</b>                         |            |            |            | 0.0089   |           |
| No                                                         | 164 (58.0) | 119 (42.0) | 283 (58.7) |          | Reference |
| Yes                                                        | 106 (73.1) | 39 (26.9)  | 145 (30.1) |          | 0.0023    |
| Don't Know                                                 | 24 (63.2)  | 14 (36.8)  | 38 (7.9)   |          | 0.54      |
| Unknown                                                    | 6 (37.5)   | 10 (62.5)  | 16 (3.3)   |          | 0.12      |
| <b>Injected any type of drug in the last 6 months</b>      |            |            |            | 0.090    |           |
| No                                                         | 152 (58.7) | 107 (41.3) | 259 (53.7) |          | Reference |
| Yes                                                        | 135 (66.8) | 67 (33.2)  | 202 (41.9) |          | 0.074     |
| Unknown                                                    | 13 (61.9)  | 8 (38.1)   | 21 (4.4)   |          | 0.77      |
| <b>Frequency of use of illicit drugs in the past month</b> |            |            |            | 0.45     |           |
| Did not use drugs                                          | 6 (46.2)   | 7 (53.8)   | 13 (2.7)   |          | Reference |
| Every day                                                  | 198 (61.9) | 122 (38.1) | 320 (66.4) |          | 0.26      |
| Few times a week                                           | 57 (67.9)  | 27 (32.1)  | 84 (17.4)  |          | 0.14      |
| Few times a month                                          | 18 (60.0)  | 12 (40.0)  | 30 (6.2)   |          | 0.40      |
| Unknown                                                    | 21 (60.0)  | 14 (40.0)  | 35 (7.3)   |          | 0.39      |
| <b>Experienced an opioid OD in the past 6 months</b>       |            |            |            | 0.29     |           |
| No                                                         | 201 (60.2) | 133 (39.8) | 334 (69.3) |          | Reference |
| Yes                                                        | 81 (67.5)  | 39 (32.5)  | 120 (24.9) |          | 0.16      |
| Don't Know                                                 | 4 (50.0)   | 4 (50.0)   | 8 (1.7)    |          | 0.56      |
| Unknown                                                    | 14 (70.0)  | 6 (30.0)   | 20 (4.1)   |          | 0.39      |
| <b>Witnessed an opioid OD in the past 6 months</b>         |            |            |            | 0.000072 |           |
| No                                                         | 68 (47.9)  | 74 (52.1)  | 142 (29.5) |          | Reference |
| Yes                                                        | 217 (68.9) | 98 (31.1)  | 315 (65.4) |          | 0.000022  |
| Don't know                                                 | 4 (80.0)   | 1 (20.0)   | 5 (1.0)    |          | 0.19      |
| Unknown                                                    | 11 (55.0)  | 9 (45.0)   | 20 (4.1)   |          | 0.55      |

\*Includes trans man, trans woman, gender non-conforming, and other specified gender.

\*\*Employed includes working part-time, full-time or being a paid volunteer.

\*\*\*Stably housed includes living in a private residence, living in another residence (hotel/motel, rooming houses, single room occupancy, or social/supportive housing). Not stably housed includes living in a shelter or having no regular place to stay (homeless, couch surfing, no fixed address).

Table 2 shows where participants reported seeing/hearing drug alerts. Responses were not mutually exclusive as participants were able to select more than one option on the survey.

Almost half (N = 143) of the participants reported they became aware of the alert through a friend or peer.

**Table 2.** Where and how participants reported seeing or hearing a drug alert

| Where Alerts Were Noticed                                   | No. Of clients* (%)** |
|-------------------------------------------------------------|-----------------------|
| Heard from a friend or peer network                         | 143 (48)              |
| At a site attended                                          |                       |
| Harm reduction site/e.g., SCS/OPS or community organization | 127 (42)              |
| Healthcare provider                                         | 36 (12)               |
| Public dissemination                                        |                       |
| Posters on the street                                       | 70 (23)               |

|                                           |         |
|-------------------------------------------|---------|
| On the news/media                         | 61 (20) |
| Through phone or internet                 |         |
| On social media e.g., Facebook or Twitter | 47 (16) |
| Received an email or text                 | 24 (8)  |
| Other                                     | 38 (13) |

\*Responses are not mutually exclusive

\*\*% of N = 300 who report seeing/hearing a drug alert

We performed bivariable regression analysis on harm reduction supply pick up frequency and perceived opioid overdose risk; a chi square test indicated the two variables are associated ( $p < 0.0000001$ ), suggesting that confounding is likely. Therefore, despite perceived risk of opioid overdose being included in backwards selection it was removed from the final model because of its potential confounding effects on harm reduction supply pick up frequency. We retained frequency of supply pick up as every level with a known frequency of supply pick up was statistically significant in the bivariable regression and, conceptually, individuals who use harm reduction services more frequently would be more likely to observe a drug alert.

Unadjusted and adjusted odds ratios are presented in Table 3 for the variables included in the final model. The adjusted odds for participants from the Island Health Authority seeing/hearing a drug alert were 2.14 times the odds (95% CI: 1.20-3.85) the participants from the Interior Health Authority seeing/hearing a drug alert. In addition, the odds of participants that picked up harm reduction supplies a few times per month in the past 6 months seeing/hearing a drug alert were 2.73 (95% CI: 1.17-6.52) times the odds of participants who had not picked up harm reduction supplies in the past 6 months. Interestingly, the adjusted odds of participants who picked up harm reduction supplies more frequently (every day or a few times per week) seeing/hearing a drug alert was not significantly different from those who had not picked up supplies in the past 6 months. Witnessing an opioid-related overdose also provided significant findings – data indicates that the odds of participants who witnessed an opioid-related overdose in the past 6 months seeing/hearing a drug alert were 2.76 (95% CI: 1.76-4.36) times the odds of participants who did not witness an opioid-related overdose in the past 6 months.

**Table 3: Unadjusted (UOR) and adjusted odds ratios (AOR) for variables included in the final model (N = 482)**

| Characteristics                                            | UOR (95% CI)       | p-value for UOR | AOR (95% CI)       | p-value for AOR |
|------------------------------------------------------------|--------------------|-----------------|--------------------|-----------------|
| <i>Demographics:</i>                                       |                    |                 |                    |                 |
| <b>Age category</b>                                        | Reference          |                 | Reference          |                 |
| ≤ 29                                                       | Reference          |                 | Reference          |                 |
| 30-39                                                      | 1.38 (0.75-2.56)   | 0.30            | 1.22 (0.63-2.38)   | 0.55            |
| 40-49                                                      | 1.52 (0.83-2.80)   | 0.18            | 1.34 (0.69-2.59)   | 0.38            |
| ≥ 50                                                       | 1.58 (0.88-2.85)   | 0.13            | 1.23 (0.63-2.38)   | 0.54            |
| Unknown                                                    | 4.85 (1.18-33.01)  | 0.050           | 6.55 (1.41-48.14)  | 0.029           |
| <b>Gender</b>                                              | Reference          |                 | Reference          |                 |
| Cis man                                                    | Reference          |                 | Reference          |                 |
| Cis woman                                                  | 1.07 (0.73-1.59)   | 0.73            | 1.04 (0.68-1.58)   | 0.86            |
| Trans and gender expansive*                                | 3,680,000 (0.00-∞) | 0.98            | 8,500,000 (0.00-∞) | 0.98            |
| Unknown                                                    | 0.85 (0.18-4.39)   | 0.84            | 0.44 (0.08-2.53)   | 0.33            |
| <b>Health Authority</b>                                    | Reference          |                 | Reference          |                 |
| Interior                                                   | Reference          |                 | Reference          |                 |
| Fraser                                                     | 1.16 (0.66-2.03)   | 0.61            | 1.13 (0.62-2.07)   | 0.68            |
| Island                                                     | 1.75 (1.03-2.99)   | 0.039           | 2.14 (1.20-3.85)   | <b>0.010*</b>   |
| Northern                                                   | 0.81 (0.46-1.40)   | 0.45            | 0.84 (0.46-1.52)   | 0.56            |
| Vancouver Coastal                                          | 1.76 (0.95-3.34)   | 0.077           | 1.88 (0.96-3.75)   | 0.070           |
| <i>Harm Reduction (HR) Characteristics:</i>                |                    |                 |                    |                 |
| <b>Frequency of HR supply pick up in the past 6 months</b> |                    |                 |                    |                 |
| Never                                                      | Reference          |                 | Reference          |                 |
| Every day                                                  | 2.67 (1.26-5.78)   | 0.011           | 1.96 (0.86-4.50)   | 0.11            |
| Few times/week                                             | 2.20 (1.07-4.64)   | 0.034           | 1.79 (0.83-3.96)   | 0.14            |
| Few times/month                                            | 2.90 (1.31-6.57)   | 0.0092          | 2.73 (1.17-6.52)   | <b>0.021*</b>   |
| Once a month or less                                       | 3.18 (1.23-8.64)   | 0.019           | 2.72 (0.99-7.79)   | 0.055           |
| Unknown                                                    | 1.54 (0.52-4.62)   | 0.44            | 1.21 (0.36-4.11)   | 0.76            |
| <i>Drug Use Characteristics:</i>                           |                    |                 |                    |                 |
| <b>Witnessed an opioid OD in the past 6 months</b>         |                    |                 |                    |                 |
| No                                                         | Reference          |                 | Reference          |                 |
| Yes                                                        | 2.41 (1.61-3.63)   | 0.000022        | 2.76 (1.76-4.36)   | <b>0.00001*</b> |
| Don't know                                                 | 4.35 (0.62-86.29)  | 0.19            | 3.91 (0.47-82.13)  | 0.25            |
| Unknown                                                    | 1.33 (0.52-3.49)   | 0.55            | 1.68 (0.60-4.85)   | 0.32            |

\*Includes trans man, trans woman, gender non-conforming, and other specified gender.

## DISCUSSION

In a 2021 cross-sectional survey administered at harm reduction sites across B.C., we found over 60% of participants reported seeing/hearing a recent drug alert and more than two-thirds who saw/heard an alert reported changing their substance use behaviour to be safer. We identified associations with seeing/hearing an alert and demographic factors (such as age and geography but not gender), frequency of supply pick up and witnessing an overdose in past six months. However we found no association with substance use factors such as frequency of substance use or injecting drugs.

Like previous studies we found, the most common source of alert information for our participants was from peers or through peer networks (24). Other studies confirm that the source of information is a valuable element in risk assessment when using drugs (25). For instance, participants in one study expressed a high level of trust for their drug dealers, that was based on the length of the relationship, drug supply consistencies, and their communication (25). Our study highlights that drug alerts have a role to play in encouraging safer substance use and also the value of peer networks in transmitting information. Therefore methods of disseminating accurate information through peer networks in order to effectively and timely share critical information should be further explored and enhanced.

A Cochran-Armitage trend test indicated that the proportion of individuals that reported seeing/hearing a drug alert increases with each age category. Individuals from different age groups may have different methods of communication. For example, younger individuals may prefer digital methods while older age groups may prefer word of mouth and belong to larger networks of people who use drugs (26). Age is an important consideration when disseminating drug alerts to ensure that all individuals receive the message in a timely and accessible manner. It also highlights the need for clear and correct information to be made available to ensure messaging by word of mouth is accurate. Consultation with PEEP also suggested that younger individuals may be less aware of drug alerts for the following reasons: they may feel that they are less at risk when using substances and they may intentionally ignore messaging surrounding drug use because of the stigma associated with it (27).

1  
2  
3 Compared to participants from Interior Health, those from Island Health had significantly  
4 higher odds of reporting seeing/hearing a drug alert. The decision to issue a drug alert is  
5 generally based on a number of factors including drug toxicity deaths (7), emergency health  
6 service calls, drug checking (11, 12) and community input. However, the availability of these  
7 factors may vary by region and therefore make it difficult to directly compare health regions.  
8 Resources such as drug checking should be made more consistently available across the province  
9 to enable standardization of the alerting process.  
10  
11  
12  
13  
14  
15

16  
17 Based on our analysis, those that picked up harm reduction supplies a few times per month  
18 (compared to those who did not pick up supplies in the past 6 months) were statistically  
19 significantly more likely to report seeing/hearing a drug alert. Paradoxically, we found that  
20 individuals that attended harm reduction sites a couple of times a week or daily were not  
21 significantly more likely to report seeing/hearing a drug alert. Although posted drugs alerts are  
22 usually removed after two weeks, a person who attends the harm reduction supply site frequently  
23 will have been exposed to the same alerts on multiple occasions. Therefore there may be ‘alert  
24 fatigue’, a phenomenon described in healthcare when frequent alerts may desensitize people, and  
25 as a result they may ignore or fail to respond appropriately to such warnings (28). Alert fatigue  
26 has also been reported in the context of drug alerts (29); therefore ways of minimizing alert  
27 fatigue should be further explored. A previous study found that individuals that defined their  
28 substance use as a chronic condition expressed that they were de-sensitized to the risk of  
29 overdose (30). During our consultation with PEEP, members suggested that those who attend  
30 harm reduction supply sites frequently may only be there for a brief time period, while those who  
31 attend sites less frequently may be there for longer as they may collect more supplies. This may  
32 partially explain the trend we observed, however, we cannot determine differences in drug use  
33 behaviour or time spent at the sites between those who visited harm reduction service sites more  
34 and less frequently.  
35  
36  
37  
38  
39  
40  
41  
42  
43  
44  
45  
46  
47  
48  
49

50 Individuals who witnessed an opioid-related overdose in the past 6 months had more than  
51 two and a half times the odds of reporting seeing/hearing a drug alert compared to participants  
52 who did not witness an opioid-related overdose. Those who witnessed an overdose have  
53 previously been found to change harm reduction behaviours; in a cohort study in B.C.,  
54  
55  
56  
57  
58  
59  
60

1  
2  
3 witnessing an overdose was found to be positively associated with using drug checking services  
4 (31). Therefore those who witness an overdose may be more sensitized to information  
5 surrounding drug alerts; however, due to the cross-sectional nature of our study, we are unable to  
6 determine causality. In contrast, we found no association with experiencing an overdose in the  
7 past 6 months and seeing /hearing a drug alert. This is consistent with previous studies which  
8 have identified that people often underestimate their own risk of an overdose. For example,  
9 despite a high level of fentanyl risk knowledge most did not translate this knowledge into a  
10 personal risk of having an overdose (32) and people who used opioids and injected more  
11 frequently and those who were older were less likely to perceive themselves as being at risk of  
12 an overdose (33). The implications of our findings and contextual realities should be further  
13 explored using qualitative methods.  
14  
15  
16  
17  
18  
19  
20  
21  
22

### 23 **Limitations**

24  
25  
26 The data used in this study are cross-sectional and as such we cannot make conclusions  
27 about temporal relationships. Additionally, generalizability is limited in this study as participants  
28 were a convenience sample of PWUD that accessed harm reduction services/sites and thus the  
29 findings may not apply to all PWUD in the province. The survey also relied on individuals'  
30 reporting and recollection of their behaviours which introduces recall bias and there is potential  
31 for social desirability for example when asked if they had seen an alert did they take steps to be  
32 safer. Data for this study was collected during the ongoing COVID-19 pandemic. However, the  
33 immediate restrictions and decreased availability of harm reduction services seen in spring 2020  
34 had been addressed and individuals were able to access in-person harm reduction services in  
35 2021.  
36  
37  
38  
39  
40  
41  
42  
43

### 44 **CONCLUSIONS**

45  
46  
47 Drug alerts disseminate important and timely information about the circulating drug supply  
48 to enable people to use more safely. Our study found most people using harm reduction services  
49 were aware of drug alerts – mainly through hearing about them through a friend or peer, and that  
50 two-thirds who became aware of an alert subsequently changed their drug use behaviour to be  
51 safer. Considering communication with friends and peers was the most common method of  
52 information sharing, developing effective strategies to disseminate critical information related to  
53  
54  
55  
56  
57  
58  
59  
60



1  
2  
3 the drug supply amongst social networks should be a priority when developing drug alerts. Drug  
4 alerts must use a variety of modes to ensure they are accessible to those who need to know.  
5  
6 Further research is needed to ensure alerts are reaching the appropriate audiences and to identify  
7  
8 how to better communicate to younger PWUD.  
9

## 10 11 **Acknowledgements**

12  
13  
14 The authors are grateful for participants who shared their valuable experiences by  
15 completing the harm reduction client survey. We also thank Kristi Papamihali for developing the  
16 2021 HRCS with input from stakeholders. We are thankful for harm reduction site staff and  
17 volunteers, and regional harm reduction coordinators for their implementation and data  
18 collection of the 2021 HRCS and for their commitment to supporting the community. We thank  
19 the Vancouver Area Network of Drug Users for piloting the HRCS. We would like to thank the  
20 Professionals for Ethical Engagement of Peers for their contributions and thoughtfulness to the  
21 development of the HRCS, for reviewing and interpreting results and for their input to this  
22 manuscript. We respectfully acknowledge that this study and work took place on the traditional,  
23 ancestral, and unceded territories of 205 First Nations and that we live and work on the lands of  
24 the Coast Salish peoples, including the territories of Musqueam, Squamish, and Tsleil-Waututh  
25 Nations.  
26  
27  
28  
29  
30  
31  
32  
33  
34

## 35 **Contributors**

36  
37  
38 KD conducted the initial thematic analysis and data analysis. BG led initial data  
39 collection and project coordination. Authors MF, LL, and JAB provided data interpretation. JAB  
40 was the principal investigator and directed data interpretation as well as project coordination.  
41 All authors (KD, MF, BG, JL, LL, JL, KL, BG, JM and JAB) provided constructive input into  
42 the manuscript; all authors read and approved the final manuscript prior to submission. JAB is  
43 responsible for the overall content as guarantor.  
44  
45  
46  
47  
48

## 49 **Funding**

50  
51  
52 The HRCS was led by principal investigator and author Dr. Jane A Buxton. The HRCS  
53 was funded by Health Canada's Substance Use and Addictions Program (Grant 1819-HQ-  
54 000054).  
55  
56  
57  
58  
59  
60

1  
2  
3 **Competing interests** - None declared.  
4

5  
6 **Data availability statement** - Data are available on reasonable request.  
7

8 **Ethical Considerations**  
9

10 The HRCS, 2021 was approved by the University of British Columbia Office Behavioural  
11 Research Ethics (#H07-00570). Verbal informed consent was obtained from each participant  
12 prior to commencing the survey.  
13  
14  
15  
16  
17  
18  
19  
20  
21  
22  
23  
24  
25  
26  
27  
28  
29  
30  
31  
32  
33  
34  
35  
36  
37  
38  
39  
40  
41  
42  
43  
44  
45  
46  
47  
48  
49  
50  
51  
52  
53  
54  
55  
56  
57  
58  
59  
60

## REFERENCES

1. Ahmad F, Cisewski J, Rossen L, *et al*. Vital Statistics Rapid Release - Provisional Drug Overdose Data [online]. Centers for Disease Control and Prevention. 2022.  
<https://www.cdc.gov/nchs/nvss/vsrr/drug-overdose-data.htm> (accessed 24 Oct 2022).
2. Special Advisory Committee on the Epidemic of Opioid Overdoses. Apparent opioid and stimulant toxicity deaths: Surveillance of opioid- and stimulant-related harms in Canada [online]. Ottawa: Public Health Agency of Canada; Dec 2022. 101 p. [https://health-infobase.canada.ca/src/doc/SRHD/Update\\_Deaths\\_2022-12.pdf](https://health-infobase.canada.ca/src/doc/SRHD/Update_Deaths_2022-12.pdf) (accessed 22 Dec 2022).
3. Special Advisory Committee on the Epidemic of Opioid Overdoses. Opioid and stimulant poisoning hospitalizations: Surveillance of opioid- and stimulant-related harms in Canada [online]. Ottawa: Public Health Agency of Canada; Dec 2022. 67 p. [https://health-infobase.canada.ca/src/doc/SRHD/Update\\_Hospitalizations\\_2022-12.pdf](https://health-infobase.canada.ca/src/doc/SRHD/Update_Hospitalizations_2022-12.pdf) (accessed 22 Dec 2022).
4. Special Advisory Committee on the Epidemic of Opioid Overdoses. Suspected opioid-related overdoses based on emergency medical services: Surveillance of opioid- and stimulant-related harms in Canada [online]. Ottawa: Public Health Agency of Canada; 2022 Jun. 28 p.  
<https://health-infobase.canada.ca/substance-related-harms/opioids-stimulants/> (accessed 24 July 2022).
5. Olding M, Boyd J, Kerr T, *et al*. “And we just have to keep going”: Task shifting and the production of burnout among overdose response workers with lived experience. *Soc Sci Med* 2021;**270**:113631. doi:10.1016/j.socscimed.2020.113631
6. Ministry of Health. Provincial health officer declares public health emergency [online]. BC Gov News. 2016 Apr 14. <https://news.gov.bc.ca/releases/2016HLTH0026-000568> (accessed 26 Apr 2022).
7. BC Coroners Service. Illicit drug toxicity deaths in BC: January 1, 2012 – August 31, 2022 [online]. Vancouver: Ministry of Public Safety & Solicitor General. 2022 Sep 28.  
<https://www2.gov.bc.ca/assets/gov/birth-adoption-death-marriage-and-divorce/deaths/coroners-service/statistical/illicit-drug.pdf> (accessed 24 Oct 2022).
8. Public Safety and Solicitor General. Ten thousand lives lost to illicit drugs since declaration of public health emergency [online]. BC Gov News. 2022 Aug 16.  
<https://news.gov.bc.ca/releases/2022PSSG0056-001250> (accessed 7 Sep 2022).

- 1  
2  
3 9. BC Coroners Service. Illicit drug toxicity type of drug data: data to August 31, 2022.  
4 Vancouver: Ministry of Public Safety & Solicitor General [online]. 2022 Sept 28, 2022.  
5 [https://www2.gov.bc.ca/assets/gov/birth-adoption-death-marriage-and-](https://www2.gov.bc.ca/assets/gov/birth-adoption-death-marriage-and-divorce/deaths/coroners-service/statistical/illicit-drug-type.pdf)  
6 [divorce/deaths/coroners-service/statistical/illicit-drug-type.pdf](https://www2.gov.bc.ca/assets/gov/birth-adoption-death-marriage-and-divorce/deaths/coroners-service/statistical/illicit-drug-type.pdf) (accessed 01 Oct 2022).  
7  
8
- 9 10. BCCDC Harm Reduction Services. Information For Alerts and People Who Use Substances  
10 [online]. Toward the heart. <https://towardtheheart.com/alerts> (accessed 18 Oct 2022).  
11  
12
- 13 11. BC Centre for Substance Use. Drug Checking [online]. BCCSU. [https://www.bccsu.ca/drug-](https://www.bccsu.ca/drug-checking/)  
14 [checking/](https://www.bccsu.ca/drug-checking/) (accessed 18 Oct 2022).  
15  
16
- 17 12. University of Victoria. Vancouver Island drug checking project [online]. UVic.  
18 <https://substance.uvic.ca/> (accessed 01 Oct 2022).  
19
- 20 13. Giné CV, Espinosa IF, Vilamala MV. New psychoactive substances as adulterants of  
21 controlled drugs. A worrying phenomenon? *Drug Testing and Analysis* 2014;**6**:819–24.  
22 doi:10.1002/dta.1610  
23  
24
- 25 14. Toward The Heart. <https://towardtheheart.com/for-pwus> (accessed 26 Oct 2022).  
26
- 27 15. Kerr T, Small W, Hyshka E, *et al.* “It’s more about the heroin”: injection drug users’  
28 response to an overdose warning campaign in a Canadian setting. *Addiction* 2013;**108**:1270–  
29 6. doi:10.1111/add.12151  
30  
31
- 32 16. Buxton JA, Spearn B, Amlani A, *et al.* The British Columbia Drug Overdose and Alert  
33 Partnership: Interpreting and sharing timely illicit drug information to reduce harms: *Journal*  
34 *of Community Safety and Well-Being* 2019;**4**:4–9. doi:10.35502/jcswb.92  
35  
36
- 37 17. Nicol JJE, Yarema MC, Jones GR, *et al.* Deaths from exposure to  
38 paramethoxymethamphetamine in Alberta and British Columbia, Canada: a case series.  
39 *CMAJ Open* 2015;**3**:E83-90. doi:10.9778/cmajo.20140070  
40  
41
- 42 18. Smit-Rigter LA, Van der Gouwe D. The neglected benefits of drug checking for harm  
43 reduction. *Internal Medicine Journal* 2020;**50**:1024–1024. doi:10.1111/imj.14953  
44  
45
- 46 19. Keijsers L, Bossong MG, Waarlo AJ. Participatory evaluation of a Dutch warning campaign  
47 for substance-users. *Health, Risk & Society* 2008;**10**:283–95.  
48 doi:10.1080/13698570802160913  
49  
50
- 51 20. Smit-Rigter LA, Van der Gouwe D. The drugs information and monitoring system (DIMS):  
52 Factsheet on drug checking in the Netherlands [online]. 2019.  
53  
54  
55  
56  
57  
58  
59

- 1  
2  
3 <https://www.trimbos.nl/docs/cd3e9e11-9555-4f8c-b851-1806dfb47fd7.pdf> (accessed 22 Dec  
4 [2022](#)).
- 5  
6  
7 21. Kuo M, Shamsian A, Tzemis D, *et al.* A drug use survey among clients of harm reduction  
8 sites across British Columbia, Canada, 2012. *Harm Reduction Journal* 2014;**11**:13.  
9 doi:10.1186/1477-7517-11-13
- 10  
11  
12 22. Xavier J, Greer A, Pauly B, *et al.* “There are solutions and I think we’re still working in the  
13 problem”: The limitations of decriminalization under the good Samaritan drug overdose act  
14 and lessons from an evaluation in British Columbia, Canada. *Int J Drug Policy*  
15 2022;**105**:103714. doi:10.1016/j.drugpo.2022.103714
- 16  
17  
18 23. Song K, Buxton JA. Peer engagement in the BCCDC harm reduction program: A narrative  
19 summary [online]. Vancouver, BC: BC Centre for Disease Control. 2021. 12 p.  
20 [https://www.llbc.leg.bc.ca/public/PubDocs/bcdocs2022/725438/725438\\_Peer\\_engagement\\_i](https://www.llbc.leg.bc.ca/public/PubDocs/bcdocs2022/725438/725438_Peer_engagement_in_the_BCCDC_harm_reduction_program.pdf)  
21 [n\\_the\\_BCCDC\\_harm\\_reduction\\_program.pdf](#) (accessed 22 Dec 2022).
- 22  
23  
24 24. Soukup-Baljak Y, Greer AM, Amlani A, *et al.* Drug quality assessment practices and  
25 communication of drug alerts among people who use drugs. *Int J Drug Policy*  
26 2015;**26**:1251–7. doi:10.1016/j.drugpo.2015.06.006
- 27  
28  
29 25. Bardwell G, Boyd J, Arredondo J, *et al.* Trusting the source: The potential role of drug  
30 dealers in reducing drug-related harms via drug checking. *Drug Alcohol Depend*  
31 2019;**198**:1–6. doi:10.1016/j.drugalcdep.2019.01.035
- 32  
33  
34 26. Loyal J, Buxton JA. Exploring the communication of drug alerts with people who use drugs  
35 and service providers [online]. Vancouver, BC: BC Centre for Disease Control. 2021. 35p.  
36 [https://towardtheheart.com/assets/uploads/1637875132V20vRO8kYDO7akKH2KdKTOP5](https://towardtheheart.com/assets/uploads/1637875132V20vRO8kYDO7akKH2KdKTOP5wZtk8P70uMca4lP.pdf)  
37 [wZtk8P70uMca4lP.pdf](#) (accessed 22 Dec 2022).
- 38  
39  
40 27. Gunn CM, Maschke A, Harris M, *et al.* Age-based preferences for risk communication in  
41 the fentanyl era: “A lot of people keep seeing other people die and that’s not enough for  
42 them.” *Addiction* 2021;**116**:1495–504. doi:10.1111/add.15305
- 43  
44  
45 28. Agency for Health Care Research and Quality. Patient Safety Network. Alert Fatigue.  
46 [online] 2019. US Department & Human Services. [https://psnet.ahrq.gov/primer/alert-](https://psnet.ahrq.gov/primer/alert-fatigue#:~:text=The%20term%20alert%20fatigue%20describes,respond%20appropriately%20to%20such%20warnings)  
47 [fatigue#:~:text=The%20term%20alert%20fatigue%20describes,respond%20appropriately%](#)  
48 [20to%20such%20warnings](#). Cited March 31, 2023
- 49  
50  
51  
52  
53  
54  
55  
56  
57  
58  
59  
60

- 1  
2  
3 29. Soukup-Baljak Y, Greer AM, Amlani A, Sampson O, Buxton JA. Drug quality assessment  
4 practices and communication of drug alerts among people who use drugs. *Int J Drug Policy*  
5 (2015) 26(12) 1251-7  
6  
7  
8 30. Harris MTH, Bagley SM, Maschke A, *et al.* Competing risks of women and men who use  
9 fentanyl: “The number one thing I worry about would be my safety and number two would  
10 be overdose.” *J Subst Abuse Treat* 2021;**125**:108313. doi:10.1016/j.jsat.2021.108313  
11  
12 31. Beaulieu T, Hayashi K, Nosova E, *et al.* Effect of witnessing an overdose on the use of drug  
13 checking services among people who use illicit drugs in Vancouver, Canada. *Am J Drug*  
14 *Alcohol Abuse*. 2020;**46**(4):506-511. doi 10.1080/00952990.2019.1708087  
15  
16 32. Moallem S, Nosova E, Milloy MJ, *et al.* Knowledge of fentanyl and perceived risk of  
17 overdose among persons who use drugs in Vancouver, Canada. *Public Health Rep*. 2019;  
18 134(4) 423-431. Doi:10.1177/0033354919857084  
19  
20 33. Rowe C, Santos GM, Behar E, Coffin PO. Correlates of overdose risk perception among  
21 illicit opioid users. *Drug Alcohol Depend*. 2016;**159**:234-239.  
22  
23 doi:10.1016/j.drugalcdep.2015.12.018  
24  
25  
26  
27  
28  
29  
30  
31  
32  
33  
34  
35  
36  
37  
38  
39  
40  
41  
42  
43  
44  
45  
46  
47  
48  
49  
50  
51  
52  
53  
54  
55  
56  
57  
58  
59  
60

1  
2  
3  
4  
5  
6  
7  
8  
9  
10  
11  
12  
13  
14  
15  
16  
17  
18  
19  
20  
21  
22  
23  
24  
25  
26  
27  
28  
29  
30  
31  
32  
33  
34  
35  
36  
37  
38  
39  
40  
41  
42  
43  
44  
45  
46  
47  
48  
49  
50  
51  
52  
53  
54  
55  
56  
57  
58  
59  
60

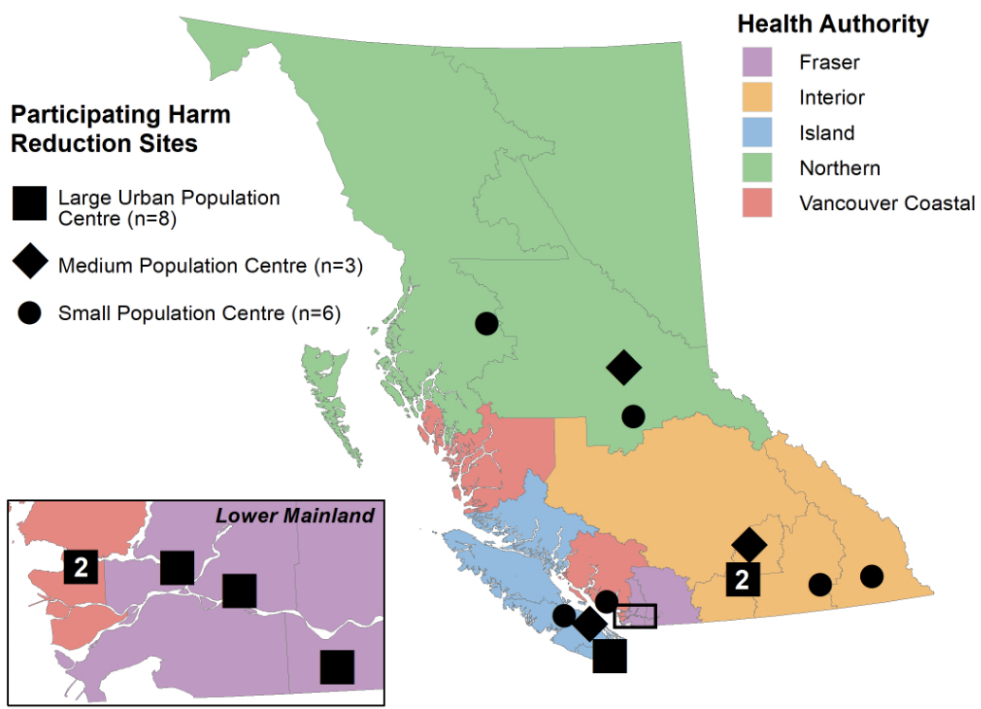

**Fig.1.** Map of sites participating in 2021 Harm Reduction Client Survey

Map of sites participating in 2021 Harm Reduction Client Survey

181x153mm (144 x 144 DPI)

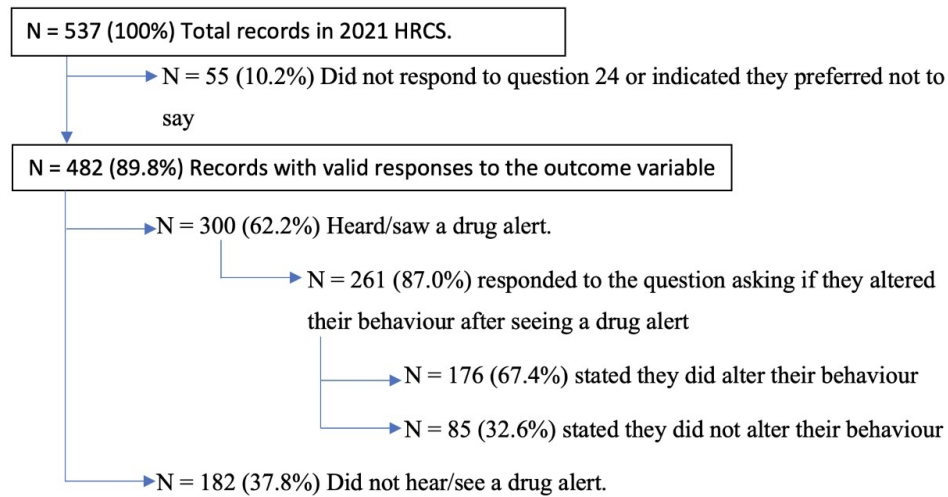

**Fig. 2.** Summary of responses to the outcome variables of interest.

Fig. 2. Summary of responses to the outcome variables of interest

225x127mm (144 x 144 DPI)



STROBE Statement—Checklist of items that should be included in reports of *cross-sectional studies*

|                              | Item No | Recommendation                                                                                                                                                                                                                                                                                                                                                                                                             |
|------------------------------|---------|----------------------------------------------------------------------------------------------------------------------------------------------------------------------------------------------------------------------------------------------------------------------------------------------------------------------------------------------------------------------------------------------------------------------------|
| <b>Title and abstract</b>    | 1       | (a) Indicate the study's design with a commonly used term in the title or the abstract (p 1)<br>(b) Provide in the abstract an informative and balanced summary of what was done and what was found (p 2)                                                                                                                                                                                                                  |
| <b>Introduction</b>          |         |                                                                                                                                                                                                                                                                                                                                                                                                                            |
| Background/rationale         | 2       | Explain the scientific background and rationale for the investigation being reported (p 3)                                                                                                                                                                                                                                                                                                                                 |
| Objectives                   | 3       | State specific objectives, including any prespecified hypotheses (p 6)                                                                                                                                                                                                                                                                                                                                                     |
| <b>Methods</b>               |         |                                                                                                                                                                                                                                                                                                                                                                                                                            |
| Study design                 | 4       | Present key elements of study design early in the paper (p 6)                                                                                                                                                                                                                                                                                                                                                              |
| Setting                      | 5       | Describe the setting, locations, and relevant dates, including periods of recruitment, exposure, follow-up, and data collection (p 6)                                                                                                                                                                                                                                                                                      |
| Participants                 | 6       | (a) Give the eligibility criteria, and the sources and methods of selection of participants (p 7)                                                                                                                                                                                                                                                                                                                          |
| Variables                    | 7       | Clearly define all outcomes, exposures, predictors, potential confounders, and effect modifiers. Give diagnostic criteria, if applicable (p 7)                                                                                                                                                                                                                                                                             |
| Data sources/<br>measurement | 8*      | For each variable of interest, give sources of data and details of methods of assessment (measurement). Describe comparability of assessment methods if there is more than one group                                                                                                                                                                                                                                       |
| Bias                         | 9       | Describe any efforts to address potential sources of bias                                                                                                                                                                                                                                                                                                                                                                  |
| Study size                   | 10      | Explain how the study size was arrived at (p 7)                                                                                                                                                                                                                                                                                                                                                                            |
| Quantitative variables       | 11      | Explain how quantitative variables were handled in the analyses. If applicable, describe which groupings were chosen and why (p 8)                                                                                                                                                                                                                                                                                         |
| Statistical methods          | 12      | (a) Describe all statistical methods, including those used to control for confounding (p 8)<br>(b) Describe any methods used to examine subgroups and interactions (p 8)<br>(c) Explain how missing data were addressed<br>(d) If applicable, describe analytical methods taking account of sampling strategy (p 8)<br>(e) Describe any sensitivity analyses                                                               |
| <b>Results</b>               |         |                                                                                                                                                                                                                                                                                                                                                                                                                            |
| Participants                 | 13*     | (a) Report numbers of individuals at each stage of study—eg numbers potentially eligible, examined for eligibility, confirmed eligible, included in the study, completing follow-up, and analysed (p 10)<br>(b) Give reasons for non-participation at each stage (p 10)<br>(c) Consider use of a flow diagram (p 10)                                                                                                       |
| Descriptive data             | 14*     | (a) Give characteristics of study participants (eg demographic, clinical, social) and information on exposures and potential confounders (p 10)<br>(b) Indicate number of participants with missing data for each variable of interest (p 10)                                                                                                                                                                              |
| Outcome data                 | 15*     | Report numbers of outcome events or summary measures (p 10)                                                                                                                                                                                                                                                                                                                                                                |
| Main results                 | 16      | (a) Give unadjusted estimates and, if applicable, confounder-adjusted estimates and their precision (eg, 95% confidence interval). Make clear which confounders were adjusted for and why they were included (p 13)<br>(b) Report category boundaries when continuous variables were categorized (p 7)<br>(c) If relevant, consider translating estimates of relative risk into absolute risk for a meaningful time period |
| Other analyses               | 17      | Report other analyses done—eg analyses of subgroups and interactions, and sensitivity analyses (p 10, 13)                                                                                                                                                                                                                                                                                                                  |

**Discussion**

|                  |    |                                                                                                                                                                                   |
|------------------|----|-----------------------------------------------------------------------------------------------------------------------------------------------------------------------------------|
| Key results      | 18 | Summarise key results with reference to study objectives (p 15)                                                                                                                   |
| Limitations      | 19 | Discuss limitations of the study, taking into account sources of potential bias or imprecision. Discuss both direction and magnitude of any potential bias (p 16)                 |
| Interpretation   | 20 | Give a cautious overall interpretation of results considering objectives, limitations, multiplicity of analyses, results from similar studies, and other relevant evidence (p 16) |
| Generalisability | 21 | Discuss the generalisability (external validity) of the study results (p 16)                                                                                                      |

**Other information**

|         |    |                                                                                                                                                                      |
|---------|----|----------------------------------------------------------------------------------------------------------------------------------------------------------------------|
| Funding | 22 | Give the source of funding and the role of the funders for the present study and, if applicable, for the original study on which the present article is based (p 18) |
|---------|----|----------------------------------------------------------------------------------------------------------------------------------------------------------------------|

\*Give information separately for exposed and unexposed groups.

**Note:** An Explanation and Elaboration article discusses each checklist item and gives methodological background and published examples of transparent reporting. The STROBE checklist is best used in conjunction with this article (freely available on the Web sites of PLoS Medicine at <http://www.plosmedicine.org/>, Annals of Internal Medicine at <http://www.annals.org/>, and Epidemiology at <http://www.epidem.com/>). Information on the STROBE Initiative is available at [www.strobe-statement.org](http://www.strobe-statement.org).
